# Supplementary material for: Mitochondrial Ca2+ Signaling Is an Electrometabolic Switch to Fuel Phagosome Killing
Source: PubMed Central journal article supplement — Cell Rep. Author manuscript; Available in PMC 2021 Jan 8. (PMC7793167; doi:10.1016/j.celrep.2020.108411), 2020-11-24
Supplement: NIHMS1649676-supplement-5.pdf [file NIHMS1649676-supplement-5.pdf]

## Mitochondrial $\text{Ca}^{2+}$ Signaling Is an Electrometabolic Switch to Fuel Phagosome Killing

### Graphical Abstract

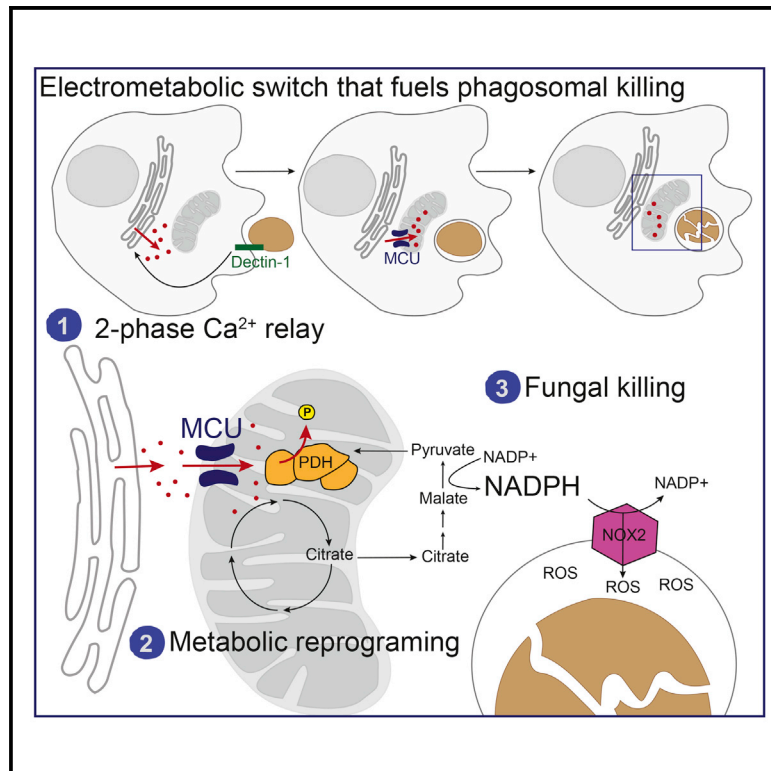

### Authors

Philip V. Seegren, Taylor K. Downs, Marta E. Stremaska, ..., Norbert Leitinger, Ammasi Periasamy, Bimal N. Desai

### Correspondence

bdesai@virginia.edu

### In Brief

The signaling mechanisms that rapidly reallocate metabolic resources to meet the bioenergetic demands of microbial killing are not understood. Seegren et al. show that mitochondrial  $\text{Ca}^{2+}$  signaling serves as a fast electrometabolic switch to fuel microbial killing by phagocytes. This study identifies the mitochondrial  $\text{Ca}^{2+}$  channel MCU as a critical component of cell-intrinsic antimicrobial responses.

### Highlights

- Identification of MCU as a major regulator of phagosomal killing by macrophages
- Mice lacking *Mcu* in myeloid cells are highly susceptible to *in vivo* candidiasis
- Fungal pathogens elicit  $\text{mCa}^{2+}$  elevations using a fast two-phase  $\text{Ca}^{2+}$  relay
- $\text{mCa}^{2+}$  signaling activates pyruvate dehydrogenase during phagocytosis

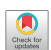

## Article

# Mitochondrial Ca<sup>2+</sup> Signaling Is an Electrometabolic Switch to Fuel Phagosome Killing

Philip V. Seegren,<sup>1,2</sup> Taylor K. Downs,<sup>1,2</sup> Marta E. Stremaska,<sup>2,3</sup> Logan R. Harper,<sup>1</sup> Ruofan Cao,<sup>4,5</sup> Rachel J. Olson,<sup>1</sup> Clint M. Upchurch,<sup>1,2</sup> Catherine A. Doyle,<sup>1,2</sup> Joel Kennedy,<sup>1</sup> Eric L. Stipes,<sup>1</sup> Norbert Leitinger,<sup>1,2</sup> Ammasi Periasamy,<sup>4,5</sup> and Bimal N. Desai<sup>1,2,6,\*</sup>

<sup>1</sup>Pharmacology Department, University of Virginia, Pinn Hall, 1340 Jefferson Park Avenue, Charlottesville, VA 22908, USA

<sup>2</sup>Carter Immunology Center, University of Virginia, 345 Crispell r. MR-6, Charlottesville, VA 22908, USA

<sup>3</sup>Microbiology, Immunology, and Cancer Biology Department, University of Virginia, Pinn Hall, 1340 Jefferson Park Avenue, Charlottesville, VA 22908, USA

<sup>4</sup>The W.M. Keck Center for Cellular Imaging, University of Virginia, Physical and Life Sciences Building (PLSB), 90 Geldard Drive, Charlottesville, VA 22904, USA

<sup>5</sup>Departments of Biology, University of Virginia, Physical and Life Sciences Building (PLSB), 90 Geldard Drive, Charlottesville, VA 22904, USA

<sup>6</sup>Lead Contact

\*Correspondence: [bdesai@virginia.edu](mailto:bdesai@virginia.edu)

<https://doi.org/10.1016/j.celrep.2020.108411>

## SUMMARY

Phagocytes reallocate metabolic resources to kill engulfed pathogens, but the intracellular signals that rapidly switch the immunometabolic program necessary to fuel microbial killing are not understood. We report that macrophages use a fast two-step Ca<sup>2+</sup> relay to meet the bioenergetic demands of phagosomal killing. Upon detection of a fungal pathogen, macrophages rapidly elevate cytosolic Ca<sup>2+</sup> (phase 1), and by concurrently activating the mitochondrial Ca<sup>2+</sup> (mCa<sup>2+</sup>) uniporter (MCU), they trigger a rapid influx of Ca<sup>2+</sup> into the mitochondria (phase 2). mCa<sup>2+</sup> signaling reprograms mitochondrial metabolism, at least in part, through the activation of pyruvate dehydrogenase (PDH). Deprived of mCa<sup>2+</sup> signaling, *Mcu*<sup>-/-</sup> macrophages are deficient in phagosomal reactive oxygen species (ROS) production and defective at killing fungi. Mice lacking MCU in their myeloid cells are highly susceptible to disseminated candidiasis. In essence, this study reveals an elegant design principle that MCU-dependent Ca<sup>2+</sup> signaling is an electrometabolic switch to fuel phagosome killing.

## INTRODUCTION

Sentinel cells such as macrophages and dendritic cells detect, engulf, and digest invading pathogens. A precisely choreographed cell-intrinsic immune response marshals a befitting adaptive immune response through the secretion of inflammatory mediators and presentation of antigenic peptides to T cells (Wang et al., 2019). Efficient killing of the engulfed pathogen by macrophages is therefore a transformative cell-intrinsic defense process in host defense. During phagosome maturation, endosomal fusion events recruit the vacuolar ATPase (V-ATPase) and NADPH oxidase (NOX) complex to the nascent phagosome (Kinchen and Ravichandran, 2008). The V-ATPase complex hydrolyzes ATP to pump protons into the phagosomal lumen, acidifying it and promoting the digestion of pathogens by acid-optimized proteases, lipases, and endonucleases. The NOX complexes oxidize NADPH to inject super oxide (O<sub>2</sub><sup>·-</sup>) into the phagosome (Nauseef, 2019), and this oxidative pressure is crucial for the destruction of fungal pathogens. Sustained NOX activity is essential for fungal defense, and patients with mutations in NOX present with frequent fungal infections (Davies et al., 2019; Gazendam et al., 2014). The overall process of phagosomal killing therefore requires a bioenergetic burst, and macrophages are adept at rapidly reprogramming their metabolism to fuel phagosomal killing (Buck et al., 2017). At the

same time, within the deadly environment of the phagosome, pathogens fight for survival by adapting their own transcriptional and metabolic programs that subvert the cell-intrinsic defenses and evade destruction (Brown, 2011; Jiménez-López and Lorenz, 2013). Our understanding of the metabolic changes that fuel the antimicrobial machineries in sentinel cells such as macrophages and dendritic is mostly limited to transcriptional changes occurring 24 h after pathogen recognition (O'Neill et al., 2016; Pals-son-McDermott et al., 2015). While these responses are critical for inflammation and resolution (Mills et al., 2018), they do not account for the immediate and early bioenergetic demands of pathogen destruction. Our study identifies a fast two-step Ca<sup>2+</sup> relay culminating in mitochondrial Ca<sup>2+</sup> (mCa<sup>2+</sup>) signaling that is required for pathogen killing in macrophages.

In screening for ion channels that regulate the cell-intrinsic immunity, we made a serendipitous discovery that the mCa<sup>2+</sup> uniporter (MCU) plays a crucial role in the killing of *C. albicans*. MCU is a Ca<sup>2+</sup>-selective ion channel located in the inner membrane of mitochondria (Chaudhuri et al., 2013; De Stefani et al., 2011; Kirichok et al., 2004). In conjunction with its regulatory subunits MICU1 and MICU2, the MCU complex can mediate a rapid influx of cytosolic Ca<sup>2+</sup> into the mitochondrial matrix (Kamer and Mootha, 2014; Mallilankaraman et al., 2012; Patron et al., 2014). The inner mitochondrial membrane has a resting membrane potential

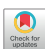

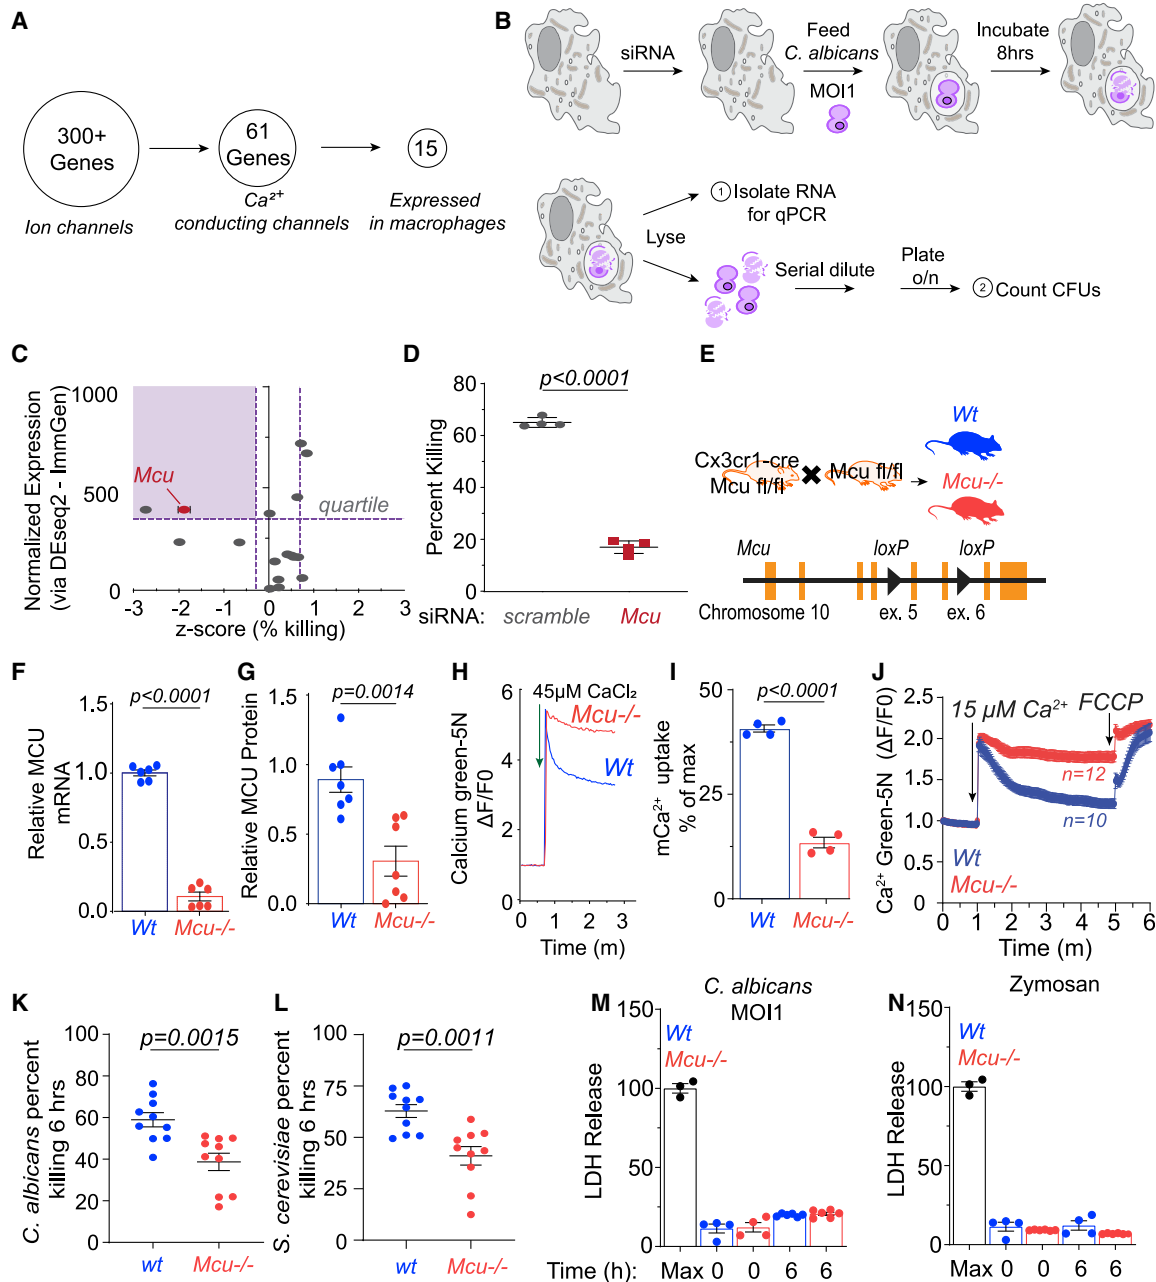

**Figure 1. MCU Has a Crucial Function in Phagosomal Killing of Fungal Pathogens**

(A) Schematic depicting the selection of siRNA targets for  $\text{Ca}^{2+}$  channel screen in myeloid cells.  
 (B) Schematic depicting the *C. albicans* killing experiment in RAW264.7 cells.  
 (C) Scatterplot showing Z scores of *C. albicans* killing in relationship to relative gene expression. Ion channel genes that were screened are shown as individual points. Z score calculations are described in STAR Methods. Normalized expression value is the average expression level across four macrophage populations (ImmGen database). Knockdown of *Mcu* (marked) resulted in a significant deficit in *C. albicans* killing relative control.  
 (D) Killing of *C. albicans* by macrophages transfected with control siRNA and *Mcu*-targeting siRNA. Individual replicates from the siRNA screen are shown ( $n = 4$ ). Error bars represent SEM;  $p < 0.0001$  according to Welch's t test, two tailed.  
 (E) Schematic showing the breeding strategy used to generate *Mcu(M)*<sup>-/-</sup> mice.  
 (F) Gene expression analysis (qPCR) of *Mcu* mRNA in WT ( $n = 6$ , mice) and *Mcu*<sup>-/-</sup> ( $n = 6$ , mice) bone-marrow-derived macrophages (BMDMs). Error bars represent SEM;  $p < 0.0001$  according to Welch's t test, two tailed.  
 (G) Protein quantification from immunoblots of whole-cell lysates from WT ( $n = 7$ , mice) and *Mcu*<sup>-/-</sup> ( $n = 7$ , mice) BMDMs. Error bars represent SEM;  $p = 0.0014$  according to Welch's t test, two tailed. See Figure S1I for immunoblots.  
 (H) Calcium green-5N  $\Delta\text{F}/\text{F}_0$  response to  $45\ \mu\text{M}$   $\text{CaCl}_2$  in WT (blue) and *Mcu*<sup>-/-</sup> (red) macrophages.  
 (I) m $\text{Ca}^{2+}$  uptake (% of max) in WT (blue) and *Mcu*<sup>-/-</sup> (red) macrophages.  $p < 0.0001$ .  
 (J) Calcium transient ( $\text{Ca}^{2+}$ -Green-5N  $\Delta\text{F}/\text{F}_0$ ) in WT (blue,  $n = 10$ ) and *Mcu*<sup>-/-</sup> (red,  $n = 12$ ) macrophages in response to  $15\ \mu\text{M}$   $\text{Ca}^{2+}$  and FCCP.  
 (K) *C. albicans* percent killing 6 hrs in WT (blue) and *Mcu*<sup>-/-</sup> (red) macrophages.  $p = 0.0015$ .  
 (L) *S. cerevisiae* percent killing 6 hrs in WT (blue) and *Mcu*<sup>-/-</sup> (red) macrophages.  $p = 0.0011$ .  
 (M) LDH Release in WT (blue) and *Mcu*<sup>-/-</sup> (red) macrophages at Max, 0, and 6 hrs after *C. albicans* infection (MOI 1).  
 (N) LDH Release in WT (blue) and *Mcu*<sup>-/-</sup> (red) macrophages at Max, 0, and 6 hrs after Zymosan treatment.

(legend continued on next page)

between  $-160$  mV and  $-200$  mV relative to the cytosol, and the enormous driving force for cationic influx into the mitochondrial matrix can be leveraged to convert cytosolic  $\text{Ca}^{2+}$  signaling into rapid metabolic responses. We report that in response to a fungal pathogen, macrophages rapidly elevate cytosolic  $\text{Ca}^{2+}$ , and by concurrently gating open the MCU (Kamer and Mootha, 2015), they trigger a near instantaneous influx of  $\text{Ca}^{2+}$  into the electrically charged mitochondria. This fast two-step  $\text{Ca}^{2+}$  relay reprograms the mitochondrial metabolism, at least in part, by activating pyruvate dehydrogenase (PDH), a key enzyme in the tricarboxylic acid (TCA) cycle.

Pyruvate is the end product of glycolysis that lies at the vital intersection of cellular metabolic network. Since its catalytic fate can govern the flux of multiple pathways, it is a keystone metabolite for metabolic reprogramming. When transported into the mitochondrial matrix, pyruvate can be directed either toward gluconeogenesis by pyruvate decarboxylase or toward the TCA cycle by the PDH complex (PDC) (Gray et al., 2014). We show that the rapid  $\text{mCa}^{2+}$  signaling promotes metabolic reprogramming by activating the PDC in macrophages. In response to fungal pathogens,  $\text{mCa}^{2+}$  signaling activates the PDH and increases intracellular citrate, an intermediate of the TCA cycle. Citrate is known to be exported from the mitochondrial matrix to the cytosol for generation of NADPH through the activity of malic enzyme (Williams and O'Neill, 2018). Thus,  $\text{mCa}^{2+}$  signaling drives the production of NADPH necessary for phagosomal ROS production. The  $\text{MCU}^{-/-}$  macrophages are deficient in the generation of phagosomal ROS and this impairs the killing of phagocytosed *C. albicans*. The higher-order immunological significance is that mice lacking MCU in their myeloid cells and thus deficient in  $\text{mCa}^{2+}$  signaling are highly susceptible to disseminated candidiasis. In essence, the study reveals a design principle that the MCU-dependent  $\text{Ca}^{2+}$ -signaling relay is a fast electrometabolic switch to fuel phagosomal killing. This design principle is likely significant for many other processes of cell-intrinsic immunity, but this study focuses exclusively on phagosomal killing of *C. albicans*.

## RESULTS

### MCU Has a Crucial Function in Cell-Autonomous Killing of Fungal Pathogens

To identify the  $\text{Ca}^{2+}$  channels necessary for macrophage fungal killing, we developed a small interfering RNA (siRNA) screen in

RAW264.7 cells, a murine macrophage cell line. The siRNAs used in the screen were validated to knock down the  $\text{Ca}^{2+}$ -conducting channels expressed in macrophages (Figure 1A). After siRNA transfection, RAW264.7 macrophages were fed *C. albicans* (MOI =1) and assessed as described for pathogen killing (Figure 1B). The Z scores, which reflect a change in the capacity to kill relative to macrophages transfected with control siRNA (scrambled siRNA), are plotted against the normalized expression of the targeted ion channels in macrophages (Figure 1C). In this screen, we identified MCU as a regulator of *C. albicans* killing in macrophages (Figure 1D). A significant defect in *C. albicans* killing at MOI1 was observed with an  $\sim 50\%$  reduction in *Mcu* transcript levels (Figure S1A). We substantiated this screen with additional tests using siRNA-mediated knockdown of MCU in bone-marrow-derived macrophages (BMDMs) and again observed a significant defect in killing *C. albicans* (Figure S1B). To further define the function of MCU in pathogen killing by macrophages, we generated a mouse line with a *CX3CR1-Cre*-driven deletion of *Mcu* in myeloid cells (herein *Mcu(M)<sup>-/-</sup>* mice) (Figure 1E). The bone marrow of *Mcu(M)<sup>-/-</sup>* mice differentiated normally into macrophages (data not shown), and both mRNA (Figure 1F) and protein levels (Figures 1G and S1I) of MCU were depleted in *Mcu<sup>-/-</sup>* macrophages. In an *in vitro* assay of  $\text{mCa}^{2+}$  uptake, the mitochondria isolated from *Mcu<sup>-/-</sup>* macrophages were deficient in their ability to rapidly take up  $\text{Ca}^{2+}$  added to the *in vitro* preparation (Figures 1H and 1I). Additionally, using a permeabilized cell assay, *Mcu<sup>-/-</sup>* macrophages showed a striking inability to take up  $\text{Ca}^{2+}$  when compared to wild-type (WT) macrophages (Figure 1J). Surprisingly, *Mcu<sup>-/-</sup>* macrophages showed no significant defect in basal ATP levels or oxygen consumption rate (OCR) (Figures S1C and S1D). Analysis of mitochondrial membrane potential using JC-1 dye showed that *Mcu<sup>-/-</sup>* macrophages show normal mitochondrial membrane potential (Figures S1E and S1F). This was further substantiated by measuring the membrane potential using the dye tetramethylrhodamine, methyl ester (TMRM). Both baseline membrane potential and carbonyl cyanide 4-(trifluoromethoxy)phenylhydrazone (FCCP)-induced depolarization were nearly identical in both WT and *Mcu<sup>-/-</sup>* macrophages (Figures S1G and S1H). These analyses show that in absence of a pathogenic challenge, *Mcu<sup>-/-</sup>* macrophages do not show any obvious mitochondrial dysfunction. However, when exposed to *C. albicans* in killing assays (MOI1), the *Mcu<sup>-/-</sup>* macrophages

(H) Mitochondrial  $\text{Ca}^{2+}$  ( $\text{mCa}^{2+}$ ) uptake assay using mitochondria isolated from WT and *Mcu<sup>-/-</sup>* BMDMs as reported by the reduction in extramitochondrial  $\text{Ca}^{2+}$  signal, after addition of  $45 \mu\text{M}$   $\text{Ca}^{2+}$  to the isolated mitochondria.

(I) Quantification of  $\text{Ca}^{2+}$  uptake in mitochondria isolated from WT ( $n = 4$ ) and *Mcu<sup>-/-</sup>* ( $n = 4$ ) BMDMs.  $\text{mCa}^{2+}$  uptake is calculated as percentage of maximum. Error bars represent SEM;  $p < 0.0001$  according to Welch's t test, two tailed.

(J)  $\text{mCa}^{2+}$  uptake assay using digitonin-permeabilized BMDMs.  $15 \mu\text{M}$   $\text{Ca}^{2+}$  was added to 500,000 digitonin-permeabilized BMDMs in a 96-well plate, and  $\text{Ca}^{2+}$  Green-5N fluorescence was monitored (Excitation/Emission 505/535 every 2 s for 6 min).  $5 \mu\text{M}$  FCCP was added as positive control to uncouple mitochondria and release  $\text{Ca}^{2+}$  at the end of each run.

(K) *C. albicans* killing by WT ( $n = 10$ ) and *Mcu<sup>-/-</sup>* ( $n = 10$ ) BMDMs. Error bars represent SEM;  $p = 0.0015$  according to Welch's t test, two tailed.

(L) Killing of *S. cerevisiae* by WT ( $n = 10$ ) and *Mcu<sup>-/-</sup>* ( $n = 10$ ) BMDMs. Error bars represent SEM;  $p < 0.0001$  according to Welch's t test, two tailed.

(M) LDH release by WT and *Mcu<sup>-/-</sup>* BMDMs in response to *C. albicans* MOI1. LDH release is reported as a percentage of maximum release (black). Error bars represent SEM; no significant difference was detected between WT and *Mcu<sup>-/-</sup>* at baseline ( $n = 4$ , each group) or 6 h ( $n = 6$ , each group) according to ordinary one-way ANOVA with multiple comparisons.

(N) LDH release by WT and *Mcu<sup>-/-</sup>* BMDMs in response to zymosan. LDH release is reported as a percent of maximum release (black). Error bars represent SEM; no significant difference was detected between WT and *Mcu<sup>-/-</sup>* at baseline ( $n = 4$ , each group) or 6 h ( $n = 6$ , each group) according to ordinary one-way ANOVA with multiple comparisons.



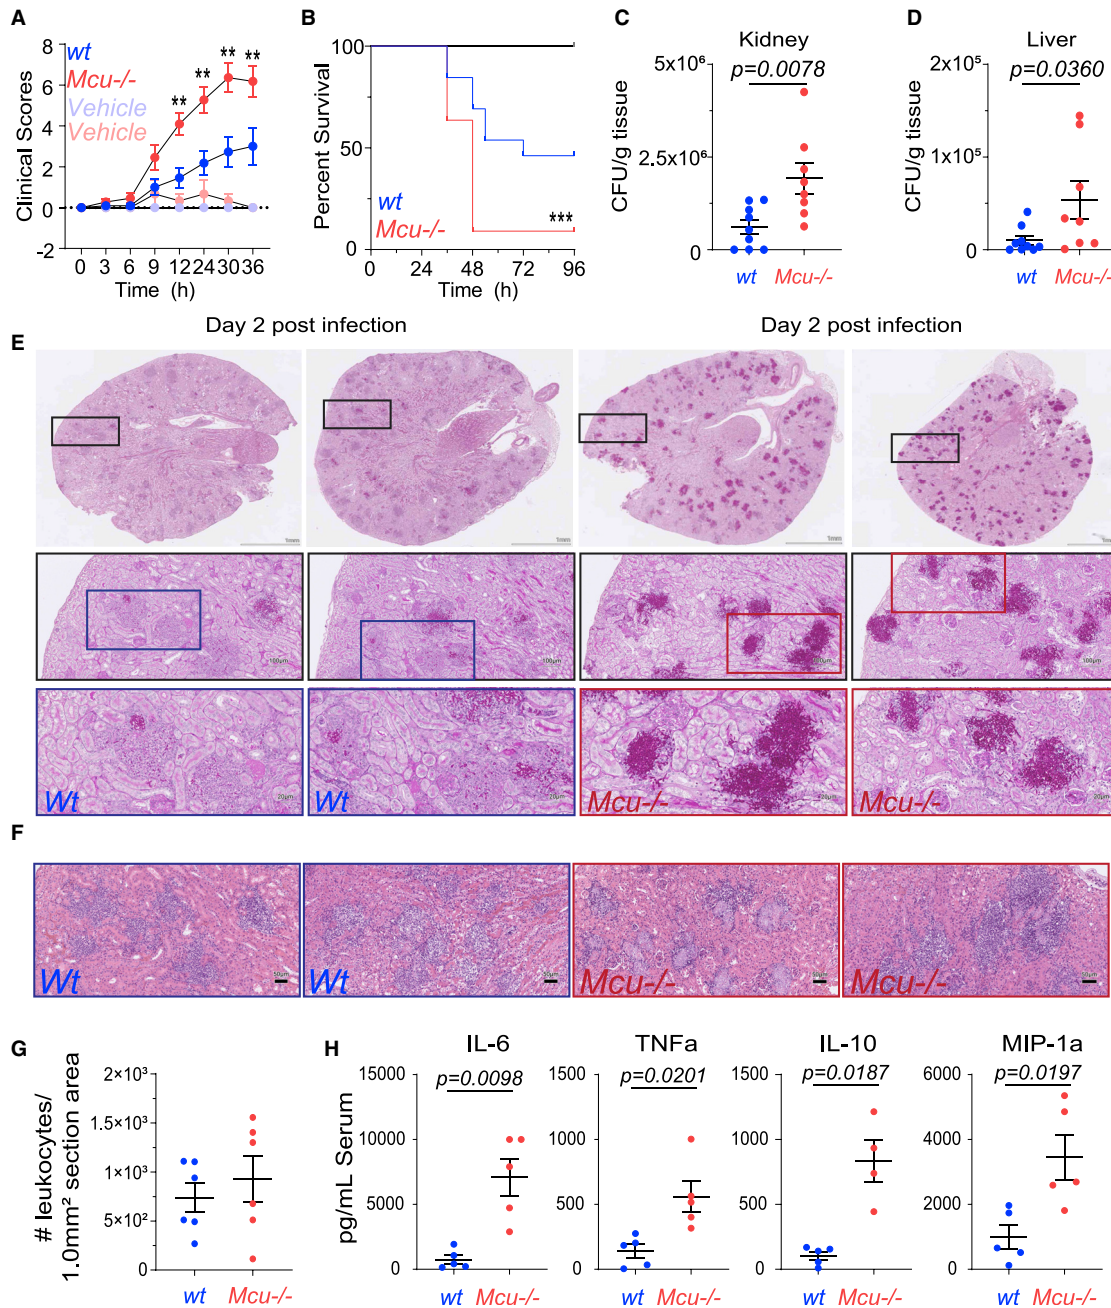

**Figure 2. *Mcu(M)*<sup>-/-</sup> Mice Are Highly Susceptible to Disseminated Candidiasis**

(A) Clinical scores in WT and *Mcu(M)*<sup>-/-</sup> mice injected in the tail vein with 100  $\mu$ L  $1 \times 10^6$  *C. albicans* or vehicle control (100  $\mu$ L 0.9% saline). Infected *Mcu(M)*<sup>-/-</sup> mice (n = 11, mice) trace is shown in red and WT (n = 13, mice) in blue. Vehicle controls for *Mcu(M)*<sup>-/-</sup> (n = 3, mice) are shown in light red and WT (n = 6, mice) in light blue. Error bars represent SEM for individual time points across three individual experiments; significance (\* $p < 0.0500$  and \*\* $p < 0.005$ ) is reported for each time point according to two-way ANOVA with multiple comparisons.

(B) Kaplan-Meier survival curves for WT and *Mcu(M)*<sup>-/-</sup> mice infected with tail vein injections of 100  $\mu$ L  $1 \times 10^6$  *C. albicans* or vehicle control (100  $\mu$ L 0.9% saline). Infected *Mcu(M)*<sup>-/-</sup> (n = 11, mice) trace is shown in red and WT (n = 13, mice) in blue. Vehicle controls for *Mcu(M)*<sup>-/-</sup> (n = 3, mice) and WT (n = 6, mice) are shown in black (no mice died). At the 48-h time point, 69.2% of WT mice are alive compared to 9.1% of *Mcu(M)*<sup>-/-</sup>. Curve comparison was made using a log-rank (Mantel-Cox) test. Data were collected from three individual experiments;  $p = 0.0008$ (\*\*\*).

(C) Colony-forming units (CFUs) of *C. albicans* counted per gram of kidney at time of sacrifice in wt (n = 9, mice) and *Mcu(M)*<sup>-/-</sup> (n = 8, mice) mice infected with tail vein injection of 100  $\mu$ L  $1 \times 10^6$  *C. albicans*. Vehicle control (100  $\mu$ L 0.9% saline) for both groups had no CFUs. Error bars represent SEM from three individual experiments;  $p = 0.0078$  according to Mann-Whitney test, two tailed.

(legend continued on next page)

exhibited a clear defect in the killing of *C. albicans* (Figure 1K) and *Saccharomyces cerevisiae* (Figure 1L). Since macrophages have been reported to undergo pyroptosis during *C. albicans* phagocytosis (Uwamahoro et al., 2014), we tested whether *Mcu*<sup>-/-</sup> macrophages are more susceptible to *C. albicans* induced pyroptosis. We found no significant release of lactate dehydrogenase (LDH) at 6 h of exposure to *C. albicans* and no difference between WT and *Mcu*<sup>-/-</sup> macrophages (Figures 1M and 1N). Together, these results reveal a role for MCU and mCa<sup>2+</sup> signaling in the cell-autonomous killing of *C. albicans*.

### *Mcu*(M)<sup>-/-</sup> Mice Are Highly Susceptible to Disseminated Candidiasis

To determine if the deletion of MCU in myeloid cells increased susceptibility to fungal infections, we tested *Mcu*(M)<sup>-/-</sup> mice in a model of disseminated candidiasis. Mice were tail vein injected with 1 × 10<sup>6</sup> viable blastospores of *C. albicans* and monitored for disease progression for 4 days post-infection. The clinical scores for the infected mice were recorded over time in a blinded protocol. *Mcu*(M)<sup>-/-</sup> mice showed increased morbidity and lethargy compared to WT mice (Figure 2A). *Mcu*(M)<sup>-/-</sup> mice also had a strikingly lower survival rate, with only 9% of mice surviving until day 4 compared to 46% in the WT control group (Figure 2B). The *Mcu*(M)<sup>-/-</sup> mice succumbed to disease at a faster rate (median survival, 48 h) than WT (median survival 72 h) (Figure 2B). We excised the livers and kidneys of the infected mice to analyze them for fungal burden. The organ homogenates were plated on YPD agar plates to derive colony-forming units (CFUs)/g tissue. *Mcu*(M)<sup>-/-</sup> mice had increased fungal burden in both kidney and liver (Figures 2C and 2D). To assess fungal burden using tissue histology, we stained kidney sections with periodic acid-Schiff (PAS), which stains mucopolysaccharides and can thereby detect fungal burden in the stained tissue. Histology of the kidney sections 2 days post-infection (dpi) showed severe fungal burden in *Mcu*(M)<sup>-/-</sup> mice (Figure 2E). The H&E tissue sections (Figure 2F) of WT and *Mcu*(M)<sup>-/-</sup> kidneys showed comparable number of immune cells (Figure 2G), indicating that the *Mcu*<sup>-/-</sup> macrophages are not deficient in the recruitment of immune cells. In fact, in comparison to WT mice, the *Mcu*(M)<sup>-/-</sup> mice exhibited substantially increased pro-inflammatory cytokines in their serum (Figure 2H). Vehicle controls had no detectable cytokine levels or any discernible changes in H&E and PAS staining (data not shown). These results indicate that the striking susceptibility of *Mcu*(M)<sup>-/-</sup> mice to *C. albicans* is not a result of defective detection of *C. albicans* or reduced output of inflam-

matory cytokines. It is predominantly due to defective cell-autonomous killing mechanisms. Since MCU mediates mitochondrial Ca<sup>2+</sup> influx, these results suggest that mCa<sup>2+</sup> signaling is a crucial component of fungal killing.

### Fungal Pathogens Trigger SOCE, Phase 1 of mCa<sup>2+</sup> Signaling

The first phase of the two-step Ca<sup>2+</sup> relay in response to fungal pathogens is the elevation of cytosolic Ca<sup>2+</sup>. The crucial requirement of cytosolic Ca<sup>2+</sup> elevation is revealed by the drastically reduced killing of fungi by macrophages loaded with a fast Ca<sup>2+</sup> chelator BAPTA-AM (Figure 3A). To record cytosolic Ca<sup>2+</sup>, we loaded BMDMs with the ratiometric Ca<sup>2+</sup> indicator Fura-2 AM. Aqueous extracts of heat-killed *S. cerevisiae* were obtained in 0 mM and 2 mM Ca<sup>2+</sup> solutions. Macrophages stimulated with both fungal extracts elicited a robust cytosolic Ca<sup>2+</sup> response (Figure 3B). The elevation of cytosolic Ca<sup>2+</sup> in macrophages stimulated in 0 mM extracellular Ca<sup>2+</sup> indicates that the Ca<sup>2+</sup> is released from an intracellular store such as the endoplasmic reticulum (ER). To measure store-operated Ca<sup>2+</sup> entry (SOCE), 10 mM Ca<sup>2+</sup> was added to the bath once the intracellular release of Ca<sup>2+</sup> returned to baseline. This resulted in a robust uptake of extracellular Ca<sup>2+</sup>, presumably through the store-operated Orai channels. Similar results were observed when macrophages were stimulated with the fungal cell wall component, β-glucan, a potent agonist of Dectin-1 (Figure 3C). Fungal stimulation of Dectin-1 has been proposed to facilitate Ca<sup>2+</sup> elevations through Syk-mediated activation of phospholipase C (PLC) (Goodridge et al., 2007; Strijbis et al., 2013). Indeed, the Ca<sup>2+</sup> elevations were completely arrested in the presence of GSK143 and U73122, potent inhibitors of Syk and PLC, respectively (Figure 3D). We measured cytosolic Ca<sup>2+</sup> in WT and *Mcu*<sup>-/-</sup> macrophages in response to zymosan (Figures 3E and 3F) and *C. albicans* extracts (Figures 3G and 3H). These results show that cytosolic Ca<sup>2+</sup> was modestly higher in *Mcu*<sup>-/-</sup> macrophages, as the rapid MCU-dependent mCa<sup>2+</sup> uptake was absent. Overall, these results show that the fungal pathogen-associated molecular patterns (PAMPs) trigger an immediate SOCE (phase 1) as a prelude to mCa<sup>2+</sup> signaling (phase 2; see below).

### Rapid Elevations in mCa<sup>2+</sup> (Phase 2) Are Detected Immediately after the Recognition of *C. albicans*

To license the activation of MCU, cytosolic Ca<sup>2+</sup> must be sufficiently elevated to allow the gatekeeper MICU1 to promote mCa<sup>2+</sup> uptake (Mallilankaraman et al., 2012). In response to

(D) CFUs of *C. albicans* counted per gram of liver at time of sacrifice in WT (n = 9, mice) and *Mcu*(M)<sup>-/-</sup> (n = 8, mice) mice infected with tail vein injection of *C. albicans* (100 μL 1 × 10<sup>6</sup>). Vehicle control (100 μL 0.9% saline) for both groups had no CFUs. Error bars represent SEM from three individual experiments; p = 0.0360 according to Mann-Whitney test, two tailed.

(E) Representative periodic acid-Schiff (PAS) staining on kidney sections from WT and *Mcu*(M)<sup>-/-</sup> mice, 2 days after tail vein injection of 100 μL (1 × 10<sup>6</sup>) *C. albicans*. Sections were mounted on slides and entire slides were imaged at 20×. Boxes represent the region of each subsequent magnification. Scale is 1 mm for whole kidney section. Scale is 100 μm and 20 μm for subsequent zooms.

(F) Representative H&E sections from WT and *Mcu*<sup>-/-</sup> kidneys. Scale bar, 50 μm.

(G) H&E stained kidneys were blindly scored for recruitment of leukocytes at time of sacrifice in infected mice (tail vein injection of 100 μL 1 × 10<sup>6</sup> *C. albicans*). Control mice (100 μL of 0.9% saline) did not show any immune cell recruitment and are not shown. Error bars represent SEM; no significant difference was detected between WT (n = 6, mice) and *Mcu*(M)<sup>-/-</sup> (n = 6, mice) according to Mann-Whitney test, two tailed.

(H) Measurement of serum cytokines using Luminex Multiplex assay. Serum samples were collected from WT (n = 5, mice) and *Mcu*(M)<sup>-/-</sup> mice (n = 4–5, mice) at the time of sacrifice and the indicated cytokines were measured. Vehicle controls had no detectable levels of serum cytokines. Error bars represent SEM; indicated p values calculated according to Welch's t test, two tailed.

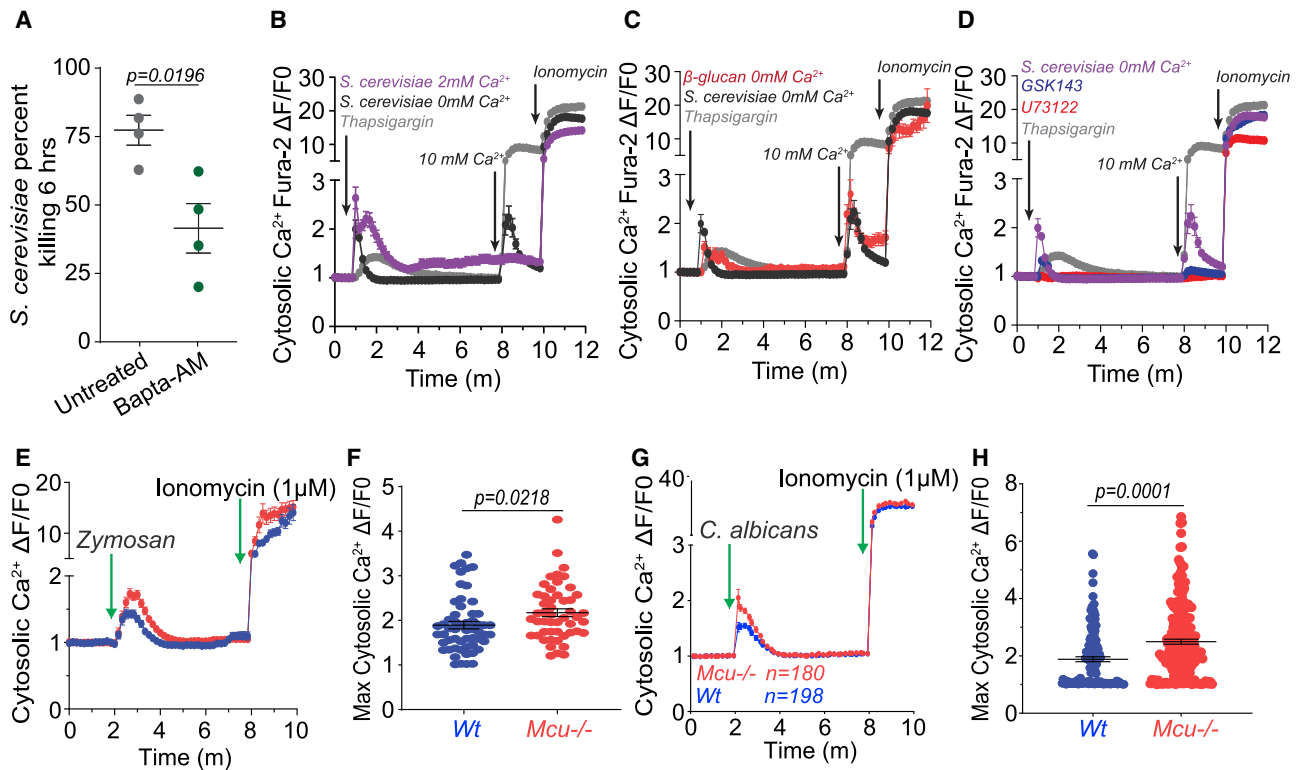

**Figure 3. Fungal Pathogens Trigger SOCE, Phase 1 of  $mCa^{2+}$  Signaling**

(A) Killing of *S. cerevisiae* by BMDMs preloaded with vehicle (n = 4) or 5  $\mu$ M BAPTA-AM (n = 4). Error bars represent SEM; p = 0.0196 according to Welch's t test, two tailed.

(B) Cytosolic  $Ca^{2+}$  elevations in BMDMs stimulated with *S. cerevisiae* extracts in 0 mM (n = 78 cells) or 2 mM  $Ca^{2+}$  (n = 44 cells) or in response to thapsigargin (w/ extracellular 0 mM  $Ca^{2+}$ ) (n = 44 cells) (positive control). [ $Ca^{2+}$ ] in the bath was raised to 2 mM to record the store-operated  $Ca^{2+}$  entry (SOCE). Ionomycin (1  $\mu$ M) added last revealed maximum  $Ca^{2+}$  responsiveness of all the Fura-2-AM-loaded cells. The plotted values were calculated as a change in fluorescence/initial fluorescence ( $\Delta F/F_0$ ). Error bars represent SEM.

(C) Cytosolic  $Ca^{2+}$  elevations in BMDMs stimulated with *S. cerevisiae* extracts in 0 mM  $Ca^{2+}$  (n = 78 cells),  $\beta$ -glucan in 0 mM  $Ca^{2+}$  (n = 68 cells), and thapsigargin (positive control). Error bars represent SEM.

(D) Cytosolic  $Ca^{2+}$  elevations in BMDMs stimulated with *S. cerevisiae* extracts in 0 mM  $Ca^{2+}$  and thapsigargin (positive control). BMDMs were stimulated in the presence of either GSK143 (2  $\mu$ M, n = 92 cells) or U73122 (1  $\mu$ M, n = 22 cells). Error bars represent SEM.

(E) Cytosolic  $Ca^{2+}$  elevations in response to zymosan in WT (n = 56 cells) and *Mcu*<sup>-/-</sup> (n = 50 cells) loaded with Fura-2 AM. These values are calculated as a change in fluorescence/initial fluorescence ( $\Delta F/F_0$ ). Error bars represent SEM.

(F) Peak cytosolic  $Ca^{2+}$  elevations in response to zymosan in WT (n = 56 cells) and *Mcu*<sup>-/-</sup> (n = 50 cells) loaded with Fura-2 AM. Error bars represent SD; p values were calculated according to Welch's t test, two tailed.

(G) Cytosolic  $Ca^{2+}$  elevations in response to *C. albicans* extracts in WT (n = 198 cells) and *Mcu*<sup>-/-</sup> (n = 180 cells) loaded with Fura-2 AM. These values are calculated as a change in fluorescence/initial fluorescence ( $\Delta F/F_0$ ). Error bars represent SEM.

(H) Peak cytosolic  $Ca^{2+}$  elevations in response to *C. albicans* supernatant in WT (n = 180 cells) and *Mcu*<sup>-/-</sup> (n = 198 cells) loaded with Fura-2 AM. Error bars represent SEM; p values were calculated according to Welch's t test, two tailed.

fungal pathogens, cytosolic  $Ca^{2+}$  is elevated through SOCE. The close juxtaposition of mitochondria to the ER then allows the second phase of the  $Ca^{2+}$  relay into the mitochondria. To measure  $mCa^{2+}$  elevations in macrophages, we established a RAW264.7 stable cell line expressing the genetically encoded  $mCa^{2+}$  sensor CEPIA3mt (Suzuki et al., 2014) (herein RAW-3mt). In these cells, CEPIA3mt colocalized with the mitochondrial marker dye MitoTracker red (Figure S2A) and reported sharp  $mCa^{2+}$  transients when the cells were treated with the  $Ca^{2+}$  ionophore ionomycin (Figures S2B and S2C). Recognition and phagocytosis of fungal pathogens is commonly simulated by zymosan particles, a sterile cell wall preparation from *S. cerevisiae* that stimulates cell surface receptors Toll-like re-

ceptor 2 (TLR2) and Dectin-1. When RAW-3mt cells are exposed to fluorescent zymosan, they readily phagocytose the particles and trigger the elevation of  $mCa^{2+}$ . As reported previously (West et al., 2011), a concurrent movement of the mitochondria to the phagosome is also seen (Video S1).  $mCa^{2+}$  elevations were recorded by drawing regions of interest (ROIs) around the mitochondrial network in macrophages actively engulfing zymosan particles (Figure 4A). Zymosan-triggered  $mCa^{2+}$  elevations were significantly reduced in RAW-3mt cells wherein MCU was knocked down with siRNA (Figure 4B). Similarly, *C. albicans* supernatant elicited robust  $mCa^{2+}$  elevations (Figure 4C) but with faster kinetics. The  $mCa^{2+}$  elevations in response to *C. albicans* are also MCU dependent (Figure 4D). The movement of the



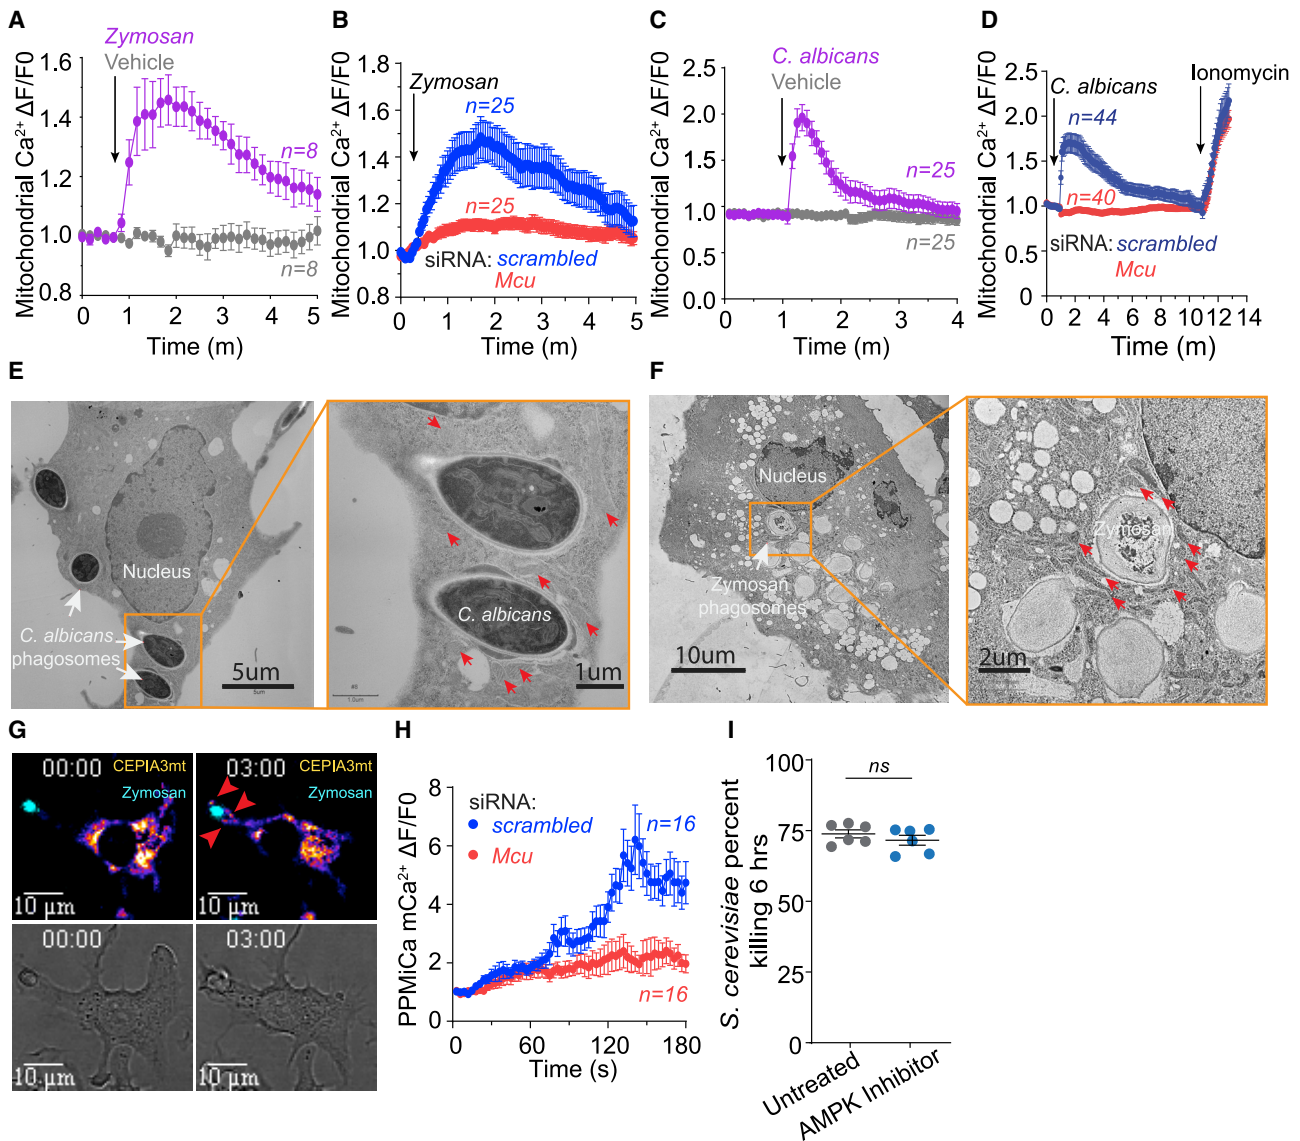

**Figure 4. Rapid Elevations in  $\text{mCa}^{2+}$  (Phase 2) Are Detected after Fungal Recognition**

(A) Whole-cell  $\text{mCa}^{2+}$  elevations in zymosan-stimulated ( $n = 8$  cells) and untreated ( $n = 8$  cells) RAW3mt macrophages. Whole-cell  $\text{mCa}^{2+}$  is taken from the average fluorescence intensity of ROIs drawn over the entire mitochondrial network. Cells were sampled every 10 s. Error bars represent SEM.

(B) Whole-cell  $\text{mCa}^{2+}$  elevations in zymosan-stimulated RAW3mt macrophages. RAW3mt cells treated with scrambled siRNA ( $n = 25$  cells) or *Mcu* siRNA ( $n = 25$  cells) were imaged every 3 s. Error bars represent SEM.

(C) Whole-cell  $\text{mCa}^{2+}$  elevations in RAW3mt macrophages stimulated with *C. albicans* extract ( $n = 25$  cells) and vehicle ( $n = 25$  cells). Cells were sampled every 5 s. Error bars represent SEM.

(D) Whole-cell  $\text{mCa}^{2+}$  elevations in RAW3mt macrophages stimulated with *C. albicans* extract. RAW3mt cells treated with scrambled siRNA ( $n = 40$  cells) or *Mcu* siRNA ( $n = 44$  cells) were imaged every 3 s. 1  $\mu\text{M}$  ionomycin was added at the end of the experiment to reveal maximum  $\text{mCa}^{2+}$  uptake. Error bars represent SEM.

(E) Representative TEM image of BMDMs infected with *C. albicans* for 6 h. Magnification of *C. albicans* phagosomes shows peri-phagosomal juxtapposition of mitochondria indicated by red arrows.

(F) Representative TEM image of BMDMs exposed to zymosan for 6 h. Magnification of zymosan phagosomes shows peri-phagosomal juxtapposition of mitochondria indicated by red arrows.

(G) Representative PPMiCa responses in RAW3mt cells. Shown are merged images of CEPIA3mt (Fire LUT) and zymosan (cyan LUT) (top) and bright-field images (bottom). Red arrows indicate PPMiCa signals.

(H) PPMiCa traces from zymosan-stimulated RAW3mt macrophages. The values are calculated as a change in fluorescence/ initial fluorescence ( $\Delta F/F_0$ ). RAW3mt cells treated with scrambled siRNA ( $n = 16$  cells) or *Mcu* siRNA ( $n = 16$  cells) were imaged every 3 s. Error bars represent SEM.

(I) Killing of *S. cerevisiae* by macrophages treated with vehicle ( $n = 5$ ) or 1  $\mu\text{M}$  AMPK inhibitor dorsomorphin dihydrochloride ( $n = 5$ ). Error bars represent SEM;  $p < 0.0001$  according to Welch's t test, two tailed.

mitochondria to the *C. albicans*-containing phagosome led us to investigate the membrane proximity through transmission electron microscopy (TEM). We observed intimate mitochondrial juxtaposition to *C. albicans*-containing phagosomes with a distance of  $\sim 50$  nm separating the phagosomal membrane from the mitochondrial outer membrane (Figure 4E). Similar association was observed in response to zymosan (Figure 4F). The close juxtaposition is therefore similar to that observed in ER-mitochondrial contact sites and such repositioning can facilitate  $mCa^{2+}$  uptake from the  $Ca^{2+}$  released from the phagosome or from the adjoining ER (Csordas et al., 2008, 2010). To analyze the  $mCa^{2+}$  elevations in the mitochondria juxtaposed with the phagosome, we analyzed the ROIs around the phagosome for changes in periphagosomal  $mCa^{2+}$  (PPMiCa). The PPMiCa elevations were then normalized to the  $mCa^{2+}$  across the mitochondrial network in that cell (Figure S2D) to reveal the PPMiCa dynamics during phagocytosis. Despite the heterogeneity of  $mCa^{2+}$  elevations in terms of amplitude and kinetics, the analysis showed that PPMiCa was significantly higher relative to the  $mCa^{2+}$  across the mitochondrial network, and in comparison to control cells, the PPMiCa elevations were suppressed in cells wherein MCU was knocked down using siRNA (Figures 4G and 4H; Video S2). Time courses of PPMiCa responses are shown in (Figure S2E; Video S3). These analyses reveal that detection and phagocytosis of fungal particles elicits the activation of MCU and robust  $mCa^{2+}$  elevations throughout the mitochondrial network. The mitochondria that are in close proximity to the phagosome show especially increased  $mCa^{2+}$  signaling. The precise regulatory mechanism underlying the gating of MCU channel during phagosomal killing is not a focus of this study. However, since it was recently reported that *Mcu* is activated by AMP-activated protein kinase (AMPK) during cell division (Zhao et al., 2019), we tested the role of AMPK inhibition during fungal killing. Macrophages treated with the AMPK inhibitor dorsomorphin dihydrochloride did not show an impairment in fungal killing (Figure 4I), indicating that MCU is not regulated by AMPK during phagosomal killing.

### **$mCa^{2+}$ Signaling Controls Phagosomal ROS Production**

The acidification of the nascent phagosome is carried out by V-ATPase complex, and we reasoned that the process may put an unusually high demand on ATP. We hypothesized that  $mCa^{2+}$  signaling during phagocytosis drives the acidification of phagosome through a burst of ATP generation in the proximity of the phagosome. To assess the engulfment of *C. albicans* and the subsequent acidification of the phagosome, we labeled *C. albicans* with two dyes, CellTrace violet (CTV), which is relatively insensitive to acidic pH, and CypHer-5E, which fluoresces brightly with low pH. The dually labeled *C. albicans* was then offered to WT and *Mcu*<sup>-/-</sup> macrophages and the cells were analyzed by flow cytometry to assess engulfment (CTV fluorescence) and phagosome acidification (CypHer-5E fluorescence). Surprisingly, these experiments revealed that *Mcu*<sup>-/-</sup> macrophages were not defective in engulfment (Figures 5A and 5B) or phagosome acidification (Figures 5C–5E). The gating strategy and representative flow cytometry plots are shown (Figures S3A–S3C). The ATP levels during phagocytosis of *C. albicans* were also normal in *Mcu*<sup>-/-</sup> macrophages (Figure 5F). In both

WT and *Mcu*<sup>-/-</sup> macrophages, cellular ATP levels decreased only modestly at 1 h and returned to baseline at 6 h post-stimulation. Recent reports have shown a role for mitochondrial ROS (mROS) in pathogen destruction (Geng et al., 2015; West et al., 2011). Using MitoSox, a fluorescent sensor of mROS, we did not see an impairment in the acute production of mROS in *Mcu*<sup>-/-</sup> macrophages during their response to the pathogenic stimuli (Figures S4A and S4B). Only after 18 h of zymosan stimulation did *Mcu*<sup>-/-</sup> macrophages begin to show a modest defect in mROS production (Figures S4C and S4D). The phagosomal destruction of pathogens is also mediated by injection of ROS in the phagosome by NADPH oxidase complex (NOX). The activity of NOX requires substantial bioenergetic expenditure in the form of NADPH. To assess phagosomal ROS generation by the NOX complex, we developed a flow cytometry-based assay. We labeled *C. albicans* with CellRox (a dye that fluoresces when oxidized by ROS) and CTV. This assay reports the NOX-mediated generation of ROS with high fidelity, and this is demonstrated by the validation control wherein the macrophages are pretreated with diphenyleioidonium (DPI), a potent inhibitor of NOX (Altenhöfer et al., 2015), prior to pathogen exposure. Macrophages treated with DPI displayed a significant decrease in CellRox fluorescence (Figures S4E–S4H). We found that production of phagosomal ROS in *Mcu*<sup>-/-</sup> macrophages engulfing *C. albicans* was also significantly reduced (to  $\sim 50\%$  relative to WT cells) 3 h post-engulfment (Figures 5G–5I). These results indicate that during phagocytosis, V-ATPase activity is not influenced by  $mCa^{2+}$  signaling, but phagosomal ROS production is highly dependent on MCU-dependent  $mCa^{2+}$  signaling.

### ***Mcu*<sup>-/-</sup> Macrophages Are Unable to Meet the NADPH Demand of Phagosomal Killing**

Since NOX activity is NADPH dependent, we reasoned that  $mCa^{2+}$  signaling controls the metabolic shift needed to increase cellular NADPH metabolism required for phagocytosis. To measure this metabolic shift, we took advantage of the native fluorescent properties of NAD(P)H and used fluorescence lifetime imaging microscopy (FLIM) for a quantitative analysis of cellular NAD(P)H levels. The NAD<sup>+</sup>/NADH and NADP<sup>+</sup>/NADPH redox couples are critical determinants of the cellular redox (Blacker et al., 2014; Wallrabe et al., 2018). FLIM enables the study of NAD(P)H photochemistry in living cells by measuring the rates of fluorescence decay (fluorescence lifetime). The lifetime of NAD(P)H fluorescence is sensitive to its microenvironment, and metabolic bursts that increase NAD(P)H levels register a sharp increase in enzyme-bound NAD(P)H with increased fluorescence lifetimes. Since the enzyme-bound fraction of NAD(P)H (fraction a2%) can be calculated based on FLIM, we explored the technique in measuring the metabolic shifts that alter NAD(P)H synthesis and utilization in macrophages engulfing and killing *C. albicans*. The WT macrophages engulfing *C. albicans* exhibit a steady increase in bound NAD(P)H fraction reflecting the increased a2% fraction (Figure 6A). Strikingly, the *Mcu*<sup>-/-</sup> macrophages show a severe deficit in a2% fraction during phagocytosis (Figures 6A and 6B). These results indicate that  $mCa^{2+}$  signaling controls the NAD(P)H metabolism during response to fungal pathogens. To substantiate these findings further, we measured NADP<sup>+</sup> and NADPH levels using



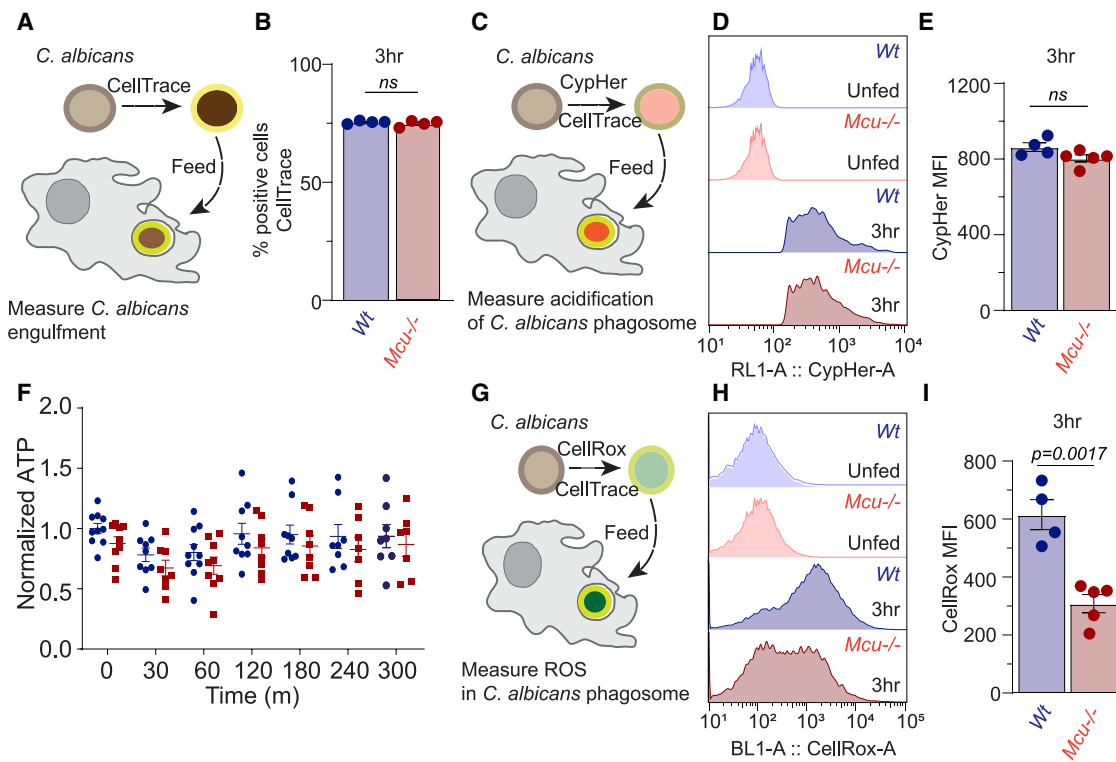

**Figure 5.  $mCa^{2+}$  Signaling Controls Phagosomal ROS Production**

(A) Schematized experimental design to measure *C. albicans* engulfment in macrophages using flow cytometry. *C. albicans* were labeled with CellTrace Violet (CTV) prior to phagocytosis.  
 (B) Quantification of CTV-positive cells at 3 h post-phagocytosis for WT (n = 4) and *Mcu*<sup>-/-</sup> (n = 4) BMDMs. Error bars represent SEM; no significance was detected according to Welch's t test, two tailed.  
 (C) Schematized experimental design to measure phagosomal acidification in macrophages using flow cytometry. *C. albicans* were labeled with CypHer5E (fluoresces with acidic pH) and CTV (to confirm engulfment) prior to phagocytosis.  
 (D) Flow cytometry histograms of CypHer5E fluorescence intensity in WT and *Mcu*<sup>-/-</sup> BMDMs after 3 h of phagocytosis.  
 (E) Quantification CypHer5E MFI in WT (n = 4) and *Mcu*<sup>-/-</sup> (n = 5) BMDMs after 3 h of phagocytosis. Error bars represent SEM; no significance was detected according to Welch's t test, two tailed.  
 (F) Quantification of relative ATP levels in WT (n = 8–10 for each time point) and *Mcu*<sup>-/-</sup> (n = 8–10 for each time point) BMDMs. Cells were stimulated with zymosan, and ATP levels were measured at each time point. Error bars represent SEM; no significance was detected according to two-way ANOVA, two tailed.  
 (G) Schematized experimental design to measure phagosomal ROS in BMDMs. *C. albicans* were labeled with CellRox (reports oxidative stress) and CTV (to confirm engulfment) prior to phagocytosis.  
 (H) Flow cytometry histograms of CellRox fluorescence intensity in WT and *Mcu*<sup>-/-</sup> BMDMs after 3 h of phagocytosis.  
 (I) Quantification CellRox MFI in WT (n = 4) and *Mcu*<sup>-/-</sup> (n = 5) BMDMs after 3 h of phagocytosis. Error bars represent SEM; p = 0.0017 according to Welch's t test, two tailed.

biochemical assays (Figures S5A–S5C). We found no significant change in the NADPH/NADP<sup>+</sup> ratio at baseline, but the ratio was significantly reduced in *Mcu*<sup>-/-</sup> macrophages after 3 h of exposure to zymosan. This difference is largely accounted by a significantly reduced levels of NADPH (~30% reduction) in *Mcu*<sup>-/-</sup> macrophages (Figure S5B). The difference in NADP<sup>+</sup> is relatively modest (Figure S5C).

### *Mcu*<sup>-/-</sup> Macrophages Exhibit an Abnormal Immunometabolic Shift in Response to Fungal Pathogens

To further characterize the defects in metabolic reprogramming, we used the Seahorse analyzer, an instrument measuring key cellular bioenergetic parameters such as OCR, which reflects oxidative phosphorylation in the mitochondria and extracellular

acidification rate (ECAR), which reflects the glycolytic activity. After 30 min of baseline measurement, we injected zymosan particles directly onto the macrophages and monitored the change in OCR and ECAR over 6 h. At baseline, WT and *Mcu*<sup>-/-</sup> macrophages showed no significant differences in OCR, but after zymosan stimulation, the *Mcu*<sup>-/-</sup> macrophages were unable to maintain the OCR (Figure 6C). Maximal OCR that the mitochondria are capable of is revealed by addition of BAM15, a mitochondrial uncoupler. Interestingly, absence of MCU modestly reduced the maximal OCR that the mitochondria are capable of during phagosomal killing (Figure S5E). Exposure to zymosan significantly increased the ECAR in both WT and *Mcu*<sup>-/-</sup> macrophages, but when compared to WT macrophages, the increase in ECAR was significantly lower in the *Mcu*<sup>-/-</sup> macrophages (Figure 6D) The difference was especially evident at 5 h post-

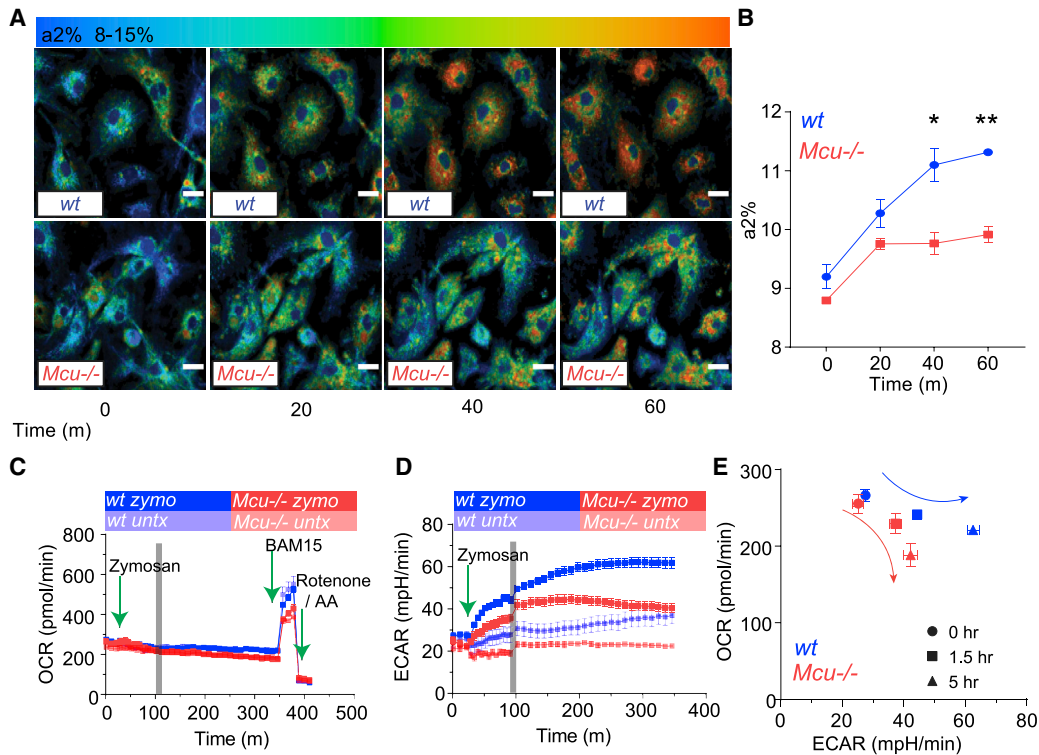

**Figure 6. *Mcu*<sup>-/-</sup> Macrophages Exhibit an Abnormal Immunometabolic Shift in Response to Fungal Pathogens**

(A) Representative FLIM images from before and after *C. albicans* engulfment. a2% is shown as a shift from blue to red. Scale bar is 10  $\mu$ m. (B) Assessment of a2% (reflects NADPH levels) in WT (n = 4) and *Mcu*<sup>-/-</sup> (n = 3) BMDMs. Error bars represent SEM; p = 0.0123 at 40 min and p = 0.0038 at 60 min according to Welch's, two-tailed test. (C) Mitochondrial oxygen consumption rate (OCR) in WT (n = 4) and *Mcu*<sup>-/-</sup> (n = 4) macrophages in response to zymosan. Cells were measured at baseline for 30 min followed by the injection of zymosan. BAM15 (mitochondrial uncoupler) and rotenone and antimycin A injected at indicated times (green arrows). (D) Extracellular acidification rate (ECAR) of WT (n = 4) and *Mcu*<sup>-/-</sup> (n = 4) macrophages in response to zymosan. Cells were measured at baseline for 30 min followed by the injection of zymosan (green arrow). The gray bar denotes a change in sampling rate from a measurement every 5 min to a measurement every 10 min. (E) Seahorse bioenergetics profile, shown as relationship of OCR and ECAR, in WT (n = 4) and *Mcu*<sup>-/-</sup> (n = 4) BMDMs responding to zymosan.

engulfment (Figure S5F). To observe the combined bioenergetics profile revealed by seahorse analysis, we plotted OCR by ECAR during the course of zymosan stimulation (Figure 6E). This reveals that *Mcu*<sup>-/-</sup> macrophages had an impaired metabolic response to fungal stimulation. *Wild-type* macrophages increase their bioenergetic output as measured by OCR and ECAR, while *Mcu*<sup>-/-</sup> macrophages do not.

### Metabolomic Analysis of *Mcu*<sup>-/-</sup> Macrophages Responding to Zymosan

Metabolomic analysis of *Mcu*<sup>-/-</sup> and WT macrophages before and after zymosan stimulation revealed considerable differences in the levels of glycolytic metabolites, but the levels of pyruvate and lactate, the final products of glycolysis, were not significantly different at 6 h (Figure S6B). There was no significant difference in the glycolytic capacity of *Mcu*<sup>-/-</sup> macrophages, as measured by the glycolytic stress test (GST) using the Seahorse analyzer (Figures S6C and S6D). The intermediates of the pentose phosphate pathway (PPP) were also altered in *Mcu*<sup>-/-</sup> macrophages (Figure S6E). We observed decreased glucose-6-phosphate and increased phosphoribosyl pyrophosphate (PRPP) in *Mcu*<sup>-/-</sup> mac-

rophages at both 3 h and 6 h of zymosan exposure. Interestingly, we saw no significant difference in G6PGDH activity following zymosan stimulation in *Mcu*<sup>-/-</sup> macrophages (Figure S6F). Nevertheless, we tested the possibility that the PPP is a key contributor of NADPH necessary for efficient fungal killing in macrophages. To test the role of the PPP in fungal killing, we inhibited G6PGDH with 6-aminonicotinamide (6-AN) but did not observe significant defects in fungal killing (Figure S6G). These findings therefore indicate that although mCa<sup>2+</sup> dynamics influence the PPP, NADPH production by the PPP is dispensable for fungal killing.

### Dysregulated TCA Cycle Underlies Defective Killing by *Mcu*<sup>-/-</sup> Macrophages

Small Molecule Pathway Database (SMPDB) analysis of metabolites revealed significant dysregulation of TCA cycle metabolites (Figures 7A and 7B). Citrate and aconitate, the TCA metabolites immediately downstream of PDH were significantly reduced in zymosan-stimulated *Mcu*<sup>-/-</sup> macrophages at 6 h (Figures 7C and 7D). We observed similar decreases in citrate at 3 h (Figure S7B). Previously, it has been suggested that the TCA cycle intermediate citrate is essential for metabolic

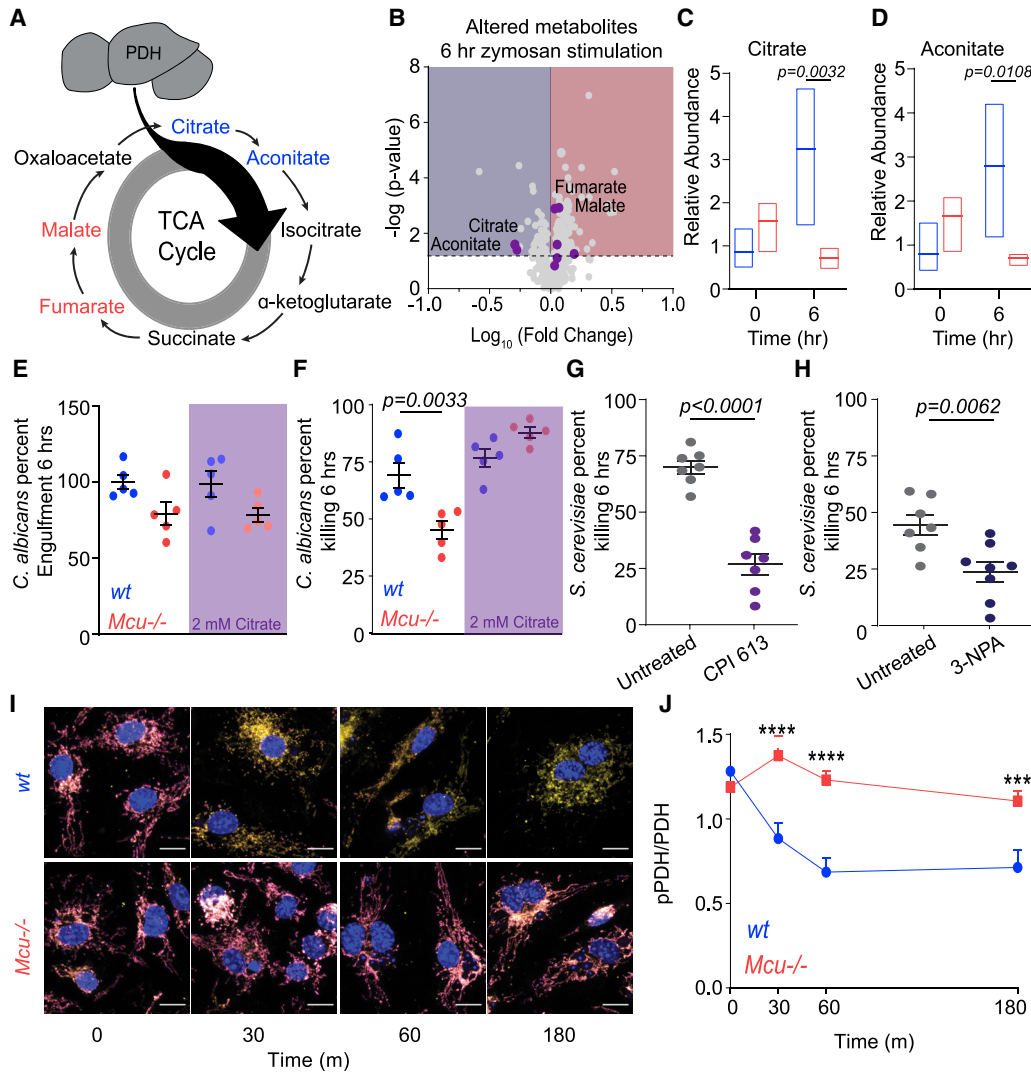

**Figure 7. Dysregulated TCA Cycle Underlies Defective Killing by *Mcu*<sup>-/-</sup> Macrophages**

(A) Schematic of TCA cycle. Metabolites reduced in *Mcu*<sup>-/-</sup> BMDMs responding to zymosan (6 h) are blue. Metabolites that increased in *Mcu*<sup>-/-</sup> BMDMs are red. (B) Volcano plot of significantly altered metabolites in *Mcu*<sup>-/-</sup> macrophages compared to WT following 6 h of zymosan stimulation. The dotted horizontal line represents the 75th percentile for  $-\log(p)$  values. TCA cycle metabolites are shown as purple dots. (C) Relative abundance of citrate measured in WT (blue) and *Mcu*<sup>-/-</sup> (red) BMDMs at baseline and 6 h following zymosan stimulation. Floating bars represent the minimum to maximum, and the line is at the mean for each dataset;  $p = 0.0032$  was detected according to two-way ANOVA, two tailed. (D) Relative abundance of aconitate measured in WT (blue) and *Mcu*<sup>-/-</sup> (red) BMDMs at baseline and 6 h following zymosan stimulation. Floating bars represent the min to max and the line is at the mean for each dataset;  $p = 0.0108$  was detected according to two-way ANOVA, two tailed. (E) *C. albicans* engulfment in WT ( $n = 5$ ) and *Mcu*<sup>-/-</sup> ( $n = 5$ ) BMDMs in the absence and presence of 2 mM citrate. Error bars represent SEM;  $p = 0.0033$  according to one-way ANOVA. (F) *C. albicans* killing by WT ( $n = 5$ ) and *Mcu*<sup>-/-</sup> ( $n = 5$ ) BMDMs in the absence and presence of 2 mM citrate. Error bars represent SEM;  $p = 0.0033$  according to one-way ANOVA. (G) Killing of *S. cerevisiae* by BMDMs treated with vehicle ( $n = 7$ ) or 100  $\mu$ M CPI 613 ( $n = 7$ ). Error bars represent SEM;  $p < 0.0001$  according to Welch's t test, two tailed. (H) Killing of *S. cerevisiae* by BMDMs treated with vehicle ( $n = 7$ ) or 100  $\mu$ M 3-nitropropionic acid ( $n = 8$ ). Error bars represent SEM;  $p < 0.0001$  according to Welch's t test, two tailed. (I) Representative IF images from WT and *Mcu*<sup>-/-</sup> BMDMs in response to *C. albicans*. pPDH (magenta LUT), PDH (yellow LUT), and nucleus (DAPI; blue LUT) were acquired using LSM880 confocal microscope. Scale bar, 10  $\mu$ m. (J) Quantification of pPDH/total PDH from WT and *Mcu*<sup>-/-</sup> macrophages in response to *C. albicans*. Cells quantified for each time point are 0 min ( $n = 31$ ), 30 min ( $n = 23$ ), 60 min ( $n = 31$ ), and 180 min ( $n = 22$ ) for wt. For *Mcu*<sup>-/-</sup>,  $n = 40$  cells were quantified (all time points). Error bars represent SEM. \*\*\* $p < 0.001$  and \*\*\*\* $p < 0.0001$ ;  $p$  values were calculated according to two-way ANOVA, two tailed.

reprogramming of macrophages during inflammatory stimulations (Williams and O'Neill, 2018). Our analysis supports these findings as the relative abundance of citrate and aconitate increased in response to zymosan stimulation (Figure S7B). However, *Mcu*<sup>-/-</sup> macrophages do not increase the relative abundance of citrate and aconitate after zymosan stimulation, indicating that mCa<sup>2+</sup> signaling is essential for this metabolic response. These data indicate that mCa<sup>2+</sup> signaling has a direct impact on TCA cycle in general and more specifically on the accumulation of citrate and aconitate during phagosomal killing. We hypothesized that mCa<sup>2+</sup>-dependent accumulation of citrate is necessary for the cytosolic NADPH generation, because citrate can be exported into the cytosol and then utilized by malic enzymes to generate NADPH. To test this hypothesis, we tested the prediction that supplementation of citrate will rescue the defective killing in *Mcu*<sup>-/-</sup> macrophages. We ascertained the ability of WT and *Mcu*<sup>-/-</sup> macrophages to kill *C. albicans* in media supplemented with 2 mM citrate. The citrate supplementation completely rescued the killing defect of *Mcu*<sup>-/-</sup> macrophages (Figures 7E and 7F). Together, these data reveal a vital role for mCa<sup>2+</sup> signaling in the regulation of TCA-cycle- and citrate-dependent NADPH generation necessary for fungal killing.

### mCa<sup>2+</sup> Triggers Dephosphorylation and Activation of PDH

As shown above, a major abnormality of the TCA cycle in *Mcu*<sup>-/-</sup> macrophages is that citrate and aconitate, the TCA metabolites immediately downstream of PDH, are significantly reduced during phagocytosis (Figures 7C and 7D).

To further substantiate the metabolic salience of the TCA cycle in phagosomal killing, we tested the inhibitors of PDH and succinate dehydrogenase (SDH), two key enzymes in the TCA cycle. Inhibition of PDH and  $\alpha$ -ketoglutarate dehydrogenase using CPI 613 and SDH with 3-nitropropionic acid (3-NPA) reduced the killing of *S. cerevisiae* (Figures 7G and 7H). These results show that the TCA cycle is critical for efficient fungal killing in macrophages. PDC is a tightly regulated multi-component enzymatic complex that catalyzes the conversion of pyruvate into acetyl-coenzyme A (acetyl-CoA). PDH, the catalytic subunit of the PDC, is phospho-regulated by PDH kinases (PDKs) and PDH phosphatases (PDPs) (Gray et al., 2014). Phosphorylation of PDH is inhibitory, whereas dephosphorylation at S293 activates the enzyme, increasing the flux of pyruvate into the TCA cycle. The PDPs are Ca<sup>2+</sup>-activated phosphatases, and we hypothesized that mCa<sup>2+</sup> signaling during phagocytosis can activate the PDC through PDH dephosphorylation. Using antibodies specific for phospho-PDH, we monitored the activation state of PDH during phagocytosis of *C. albicans*. Macrophages engulfing *C. albicans* were stained with antibodies against PDH and phospho-PDH (pPDH). Confocal immunofluorescence microscopy was used to visualize and quantify total PDH and pPDH at multiple time points. These results show striking dephosphorylation of PDH in WT macrophages, but not in *Mcu*<sup>-/-</sup> macrophages (Figure 7I). Representative images are shown for WT and *Mcu*<sup>-/-</sup> macrophages at 30, 60, and 180 min after exposure to *C. albicans* (Figures S7C–S7F). Quantification of images enabled the derivation of pPDH/PDH ratio (Figure 7J), and the results clearly demonstrate that dephosphorylation of PDH, a pivotal regulatory event in cellular meta-

bolism, is highly dependent on MCU-mediated mCa<sup>2+</sup> signaling initiated for the cell-intrinsic response to *C. albicans*.

### DISCUSSION

Our current understanding of immunometabolic reprogramming relies heavily on transcriptional changes initiated during macrophage activation. Such reprogramming undoubtedly plays an important role during an immune response, but transcriptional changes are too slow to mediate the metabolic burst required by the sentinel phagocytes when they first encounter and engulf a pathogen. How do the phagocytes rapidly switch the primary gears of their cellular metabolism during phagocytosis? Our study provides an important insight into this fundamental question. Although our study focuses on the killing of *C. albicans* by macrophages, the underlying design principle may be of relevance to fast immunometabolic reprogramming in a variety of scenarios. In essence, we propose that the MCU-dependent mCa<sup>2+</sup> signaling is an electrometabolic switch to fuel cell-intrinsic immune responses.

Macrophages recognize *C. albicans* through the pattern-recognition receptors TLR2 and Dectin-1 (Goodridge et al., 2007). We show that recognition of *C. albicans* elicits a sharp elevation in cytosolic Ca<sup>2+</sup> through SOCE. The phagocytes use this sharp but transient increase in cytosolic Ca<sup>2+</sup> to mediate a MCU-dependent influx of Ca<sup>2+</sup> into the mitochondrial matrix. The outer membrane of the mitochondria is not a barrier to this process, because it is freely permeable to cations, and once MCU is gated open, the membrane potential (–180 mV) across the inner membrane serves as a strong driving force for Ca<sup>2+</sup> entry into the matrix (Kamer and Mootha, 2014). The mechanisms that activate MCU are not fully understood yet, but it is clear that MICU1 and MICU2, the two Ca<sup>2+</sup>-sensing subunits of the MCU complex, play a key role in gating MCU. A recent study reported the direct gating of the MCU pore by AMPK-mediated phosphorylation (Zhao et al., 2019), but we observed that AMPK inhibition has no impact on mCa<sup>2+</sup> signaling triggered by fungal pathogens. Whether the MCU complex is regulated through rapid post-translational modifications during cell-intrinsic immune responses remains an outstanding question that we plan to address in an independent line of investigation. In any case, when macrophages encounter *C. albicans*, the sharp increases in cytosolic Ca<sup>2+</sup> and concurrent gating of MCU mediate a rapid influx of Ca<sup>2+</sup> into the matrix of the charged mitochondria.

Inside the mitochondrial matrix, Ca<sup>2+</sup> can activate multiple enzyme complexes to stimulate the TCA cycle. These include the PDH, isocitrate dehydrogenase (IDH) and oxoglutarate dehydrogenase (OGDH) (Denton, 2009). As a major determinant of the metabolic fate of pyruvate, the PDC is central node in metabolism, and it is especially sensitive to Ca<sup>2+</sup>-mediated phosphoregulation. We have shown that in macrophages engulfing *C. albicans*, the dephosphorylation (activation) of PDH is highly dependent on mCa<sup>2+</sup> signaling. These findings are also supported by metabolomics analysis of the TCA cycle. Concomitant regulation of IDH and OGDH is also likely, but this was not investigated in our study. Together, the effect of mCa<sup>2+</sup> signaling is rapid and profound. Interestingly, *Mcu*<sup>-/-</sup> macrophages can sustain the ATP levels necessary for the immune response, but mCa<sup>2+</sup>



signaling is critical for increasing cellular NAD(P)H levels. In macrophages phagocytosing *C. albicans*, there is increased NADPH production to drive NOX2-dependent phagosomal ROS production. The generation of NADPH is largely dependent on the PPP and TCA cycle. During phagosomal killing, we show that inhibition of the PPP has little or no effect on killing, but inhibition of TCA enzymes drastically reduces killing. This suggests that mCa<sup>2+</sup> signaling initiated during phagosomal killing drives the production of NADPH through the TCA cycle. Indeed, the defective killing by *Mcu*<sup>-/-</sup> macrophages can be rescued by supplementation of citrate, the key TCA intermediate that accumulates in an *Mcu*-dependent manner. Citrate is known to be exported out of the mitochondria and serve as a substrate for malic-enzyme-mediated NADPH production. The major sources of NADPH in the cell are the PPP, folate metabolism, and malic enzyme. We show that the PPP is dispensable for early pathogen killing, but instead, the TCA cycle, and specifically citrate, are necessary for fungal killing. We have shown that mCa<sup>2+</sup> signaling is a key regulator of the TCA cycle, and in the absence of mCa<sup>2+</sup> signaling, there is a reduction in citrate levels. Citrate is also of long-term importance to immunometabolism, because it is a necessary intermediate for fatty acid synthesis (Williams and O'Neill, 2018). It is therefore highly likely that over a more extended period, mCa<sup>2+</sup> signaling also controls the citrate shuttle necessary for fatty acid synthesis and membrane biogenesis. In addition to the direct regulation of PDH and NADPH levels, mCa<sup>2+</sup> signaling may also govern other important anaplerotic demands of phagosomal killing. However, since this study relied on snapshots of metabolite levels and did not evaluate metabolic flux using radioisotope labeling studies, a comprehensive understanding of the metabolic deficits in *Mcu*<sup>-/-</sup> macrophages is still pending.

Previous studies have proposed a crucial role for mROS in phagosomal killing of bacteria (West et al., 2011). This study reported that ECSIT-depleted macrophages were deficient in bacterial killing over a 12- to 24-h period because of a deficit in the production of mROS. A more recent study from the same lab (Carneiro et al., 2018) indicates that ECSIT<sup>-/-</sup> macrophages constitutively generate high levels of mROS but remain deficient in additional production of mROS during TLR stimulation. In our study, both WT and *Mcu*<sup>-/-</sup> macrophages increased mROS production comparably in response to zymosan. *Mcu*<sup>-/-</sup> macrophages showed no significant difference in the immediate production of mROS production, but when we measured mROS production 18 h after zymosan stimulation, we detected a modest deficit in *Mcu*<sup>-/-</sup> macrophages. While it is possible that these modest deficits in mROS production contribute to phagosomal ROS in case of bacterial killing, our findings support a model wherein mCa<sup>2+</sup> signaling is a key determinant of NOX-mediated phagosomal ROS production. We propose a simple and elegant design principle that mCa<sup>2+</sup> signaling is an electrometabolic switch to fuel phagosomal killing and other cell-intrinsic defense mechanisms.

## STAR★METHODS

Detailed methods are provided in the online version of this paper and include the following:

- KEY RESOURCES TABLE

## ● RESOURCE AVAILABILITY

- Lead Contact
- Materials Availability
- Data and Code Availability

## ● EXPERIMENTAL MODEL AND SUBJECT DETAILS

- Mouse Strains
- Cell lines and Cell Culture

## ● METHOD DETAILS

- Ca<sup>2+</sup> Channel siRNA screen
- *In vivo* (mouse) disseminated candidiasis model
- Isolation of mitochondria
- Killing assays
- *In vitro* Mitochondrial Ca<sup>2+</sup> uptake assay
- Preparation of fungal aqueous extracts
- LDH Release Assay
- Generation of RAW3mt stable cell line
- Live cell mitochondrial Ca<sup>2+</sup> imaging during zymosan phagocytosis
- Transmission Electron Microscopy (TEM)
- Cytosolic Ca<sup>2+</sup> imaging using ratiometric Fura-2
- ATP Measurements
- Flow cytometry
- Mitochondrial ROS
- Fluorescence Lifetime Imaging (FLIM) Microscopy
- Seahorse Assays
- Immunofluorescence
- Metabolomics

## ● QUANTIFICATION AND STATISTICAL ANALYSIS

- Statistics

## SUPPLEMENTAL INFORMATION

Supplemental Information can be found online at <https://doi.org/10.1016/j.celrep.2020.108411>.

## ACKNOWLEDGMENTS

We thank the members of the Desai and Leitinger laboratories for scientific insights and technical help. We also thank Drs. Hervé Agaisse (UVA), Doug Bayliss (UVA), Michelle Bland (UVA), Sarah Ewald (UVA), and Kevin Lynch (UVA) for helpful and timely advice. We thank the lab of Dr. Sarah Ewald (UVA) for the use of an LSM880 microscope and the W.M. Keck Center for Cellular Imaging (UVA) for the use of Zeiss 780 multiphoton FLIM microscope and Leica SP5X confocal; these instruments are supported by NIH instrumentation grants OD016446 and RR025616, respectively (A.P.). We also thank the following core facilities for their technical resources and support: UVA Flow Cytometry Core, Carter Immunology Center Flow Cytometry Core, Advanced Microscopy Facility Core (UVA), and the UVA Research Histology Core. The work was predominantly funded by NIH research grants GM108989 (B.N.D.), T32 GM007055-46 (P.V.S.), and AG067048 (A.P.).

## AUTHOR CONTRIBUTIONS

Conceptualization, P.V.S. and B.N.D.; Methodology, P.V.S. and B.N.D.; Investigation, P.V.S., T.K.D., M.E.S., C.A.D., L.H., R.J.O., and R.C.; Formal Analysis, P.V.S., T.K.D., and R.C.; Resources, N.L., C.M.U., E.J.S., J.K., and A.P.; Writing – Original Draft and Writing – Review & Editing: P.V.S., T.K.D., and B.N.D.; Project Administration, B.N.D.

## DECLARATION OF INTERESTS

The authors declare no competing interests.



Received: January 14, 2020  
Revised: July 30, 2020  
Accepted: October 28, 2020  
Published: November 24, 2020

## REFERENCES

- Altenhöfer, S., Rademacher, K.A., Kleikers, P.W., Wingler, K., and Schmidt, H.H. (2015). Evolution of NADPH oxidase inhibitors: selectivity and mechanisms for target engagement. *Antioxid. Redox Signal.* *23*, 406–427.
- Blacker, T.S., Mann, Z.F., Gale, J.E., Ziegler, M., Bain, A.J., Szabadkai, G., and Duchon, M.R. (2014). Separating NADH and NADPH fluorescence in live cells and tissues using FLIM. *Nat. Commun.* *5*, 3936.
- Brown, G.D. (2011). Innate antifungal immunity: the key role of phagocytes. *Annu. Rev. Immunol.* *29*, 1–21.
- Buck, M.D., Sowell, R.T., Kaech, S.M., and Pearce, E.L. (2017). Metabolic instruction of immunity. *Cell* *169*, 570–586.
- Carneiro, F.R.G., Lepelley, A., Seeley, J.J., Hayden, M.S., and Ghosh, S. (2018). An essential role for ECSIT in mitochondrial complex I assembly and mitophagy in macrophages. *Cell Rep.* *22*, 2654–2666.
- Chaudhuri, D., Sancak, Y., Mootha, V.K., and Clapham, D.E. (2013). MCU encodes the pore conducting mitochondrial calcium currents. *eLife* *2*, e00704.
- Conti, H.R., Huppler, A.R., Whibley, N., and Gaffen, S.L. (2014). Animal models for candidiasis. *Curr. Protoc. Immunol.* *105*, 19.16.11–17.
- Csordas, G., Renken, C., Varnai, P., Walter, L., Weaver, D., Buttle, K.F., Balla, T., Mannella, C.A., and Hajnoczky, G. (2008). Structural and functional features and significance of the physical linkage between ER and mitochondria. *J. Neurochem.* *104*, 6–6.
- Csordás, G., Várnai, P., Golenár, T., Roy, S., Purkins, G., Schneider, T.G., Balla, T., and Hajnoczky, G. (2010). Imaging interorganelle contacts and local calcium dynamics at the ER-mitochondrial interface. *Mol. Cell* *39*, 121–132.
- Davies, L.C., Rice, C.M., McVicar, D.W., and Weiss, J.M. (2019). Diversity and environmental adaptation of phagocytic cell metabolism. *J. Leukoc. Biol.* *105*, 37–48.
- De Stefani, D., Raffaello, A., Teardo, E., Szabò, I., and Rizzuto, R. (2011). A forty-kilodalton protein of the inner membrane is the mitochondrial calcium uniporter. *Nature* *476*, 336–340.
- Denton, R.M. (2009). Regulation of mitochondrial dehydrogenases by calcium ions. *Biochim. Biophys. Acta* *1787*, 1309–1316.
- Gazendam, R.P., van Hamme, J.L., Tool, A.T., van Houdt, M., Verkuijlen, P.J., Herbst, M., Liese, J.G., van de Veerdonk, F.L., Roos, D., van den Berg, T.K., and Kuijpers, T.W. (2014). Two independent killing mechanisms of *Candida albicans* by human neutrophils: evidence from innate immunity defects. *Blood* *124*, 590–597.
- Geng, J., Sun, X., Wang, P., Zhang, S., Wang, X., Wu, H., Hong, L., Xie, C., Li, X., Zhao, H., et al. (2015). Kinases Mst1 and Mst2 positively regulate phagocytic induction of reactive oxygen species and bactericidal activity. *Nat. Immunol.* *16*, 1142–1152.
- Goodridge, S.H., Simmons, R.M., and Underhill, D.M. (2007). Dectin-1 stimulation by *Candida albicans* yeast or zymosan triggers NFAT activation in macrophages and dendritic cells. *J. Immunol.* *178*, 3107–3115.
- Gray, L.R., Tompkins, S.C., and Taylor, E.B. (2014). Regulation of pyruvate metabolism and human disease. *Cell. Mol. Life Sci.* *71*, 2577–2604.
- Jiménez-López, C., and Lorenz, M.C. (2013). Fungal immune evasion in a model host-pathogen interaction: *Candida albicans* versus macrophages. *PLoS Pathog.* *9*, e1003741.
- Kamer, K.J., and Mootha, V.K. (2014). MICU1 and MICU2 play nonredundant roles in the regulation of the mitochondrial calcium uniporter. *EMBO Rep.* *15*, 299–307.
- Kamer, K.J., and Mootha, V.K. (2015). The molecular era of the mitochondrial calcium uniporter. *Nat. Rev. Mol. Cell Biol.* *16*, 545–553.
- Kinchen, J.M., and Ravichandran, K.S. (2008). Phagosome maturation: going through the acid test. *Nat. Rev. Mol. Cell Biol.* *9*, 781–795.
- Kirchok, Y., Krapivinsky, G., and Clapham, D.E. (2004). The mitochondrial calcium uniporter is a highly selective ion channel. *Nature* *427*, 360–364.
- Mallilankaraman, K., Doonan, P., Cárdenas, C., Chandramoorthy, H.C., Müller, M., Miller, R., Hoffman, N.E., Gandhirajan, R.K., Molgó, J., Birnbaum, M.J., et al. (2012). MICU1 is an essential gatekeeper for MCU-mediated mitochondrial Ca<sup>2+</sup> uptake that regulates cell survival. *Cell* *151*, 630–644.
- Mills, E.L., Ryan, D.G., Prag, H.A., Dikovskaya, D., Menon, D., Zaslona, Z., Jedrychowski, M.P., Costa, A.S.H., Higgins, M., Hams, E., et al. (2018). Itaconate is an anti-inflammatory metabolite that activates Nrf2 via alkylation of KEAP1. *Nature* *556*, 113–117.
- Nauseef, W.M. (2019). The phagocyte NOX2 NADPH oxidase in microbial killing and cell signaling. *Curr. Opin. Immunol.* *60*, 130–140.
- O'Neill, L.A., Kishton, R.J., and Rathmell, J. (2016). A guide to immunometabolism for immunologists. *Nat. Rev. Immunol.* *16*, 553–565.
- Palsson-McDermott, E.M., Curtis, A.M., Goel, G., Lauterbach, M.A.R., Sheedy, F.J., Gleeson, L.E., van den Bosch, M.W.M., Quinn, S.R., Domingo-Fernandez, R., Johnston, D.G.W., et al. (2015). Pyruvate kinase M2 regulates Hif-1 $\alpha$  activity and IL-1 $\beta$  induction and is a critical determinant of the warburg effect in LPS-activated macrophages. *Cell Metab.* *21*, 65–80.
- Patron, M., Checchetto, V., Raffaello, A., Teardo, E., Vecellio Reane, D., Mantovan, M., Granatiero, V., Szabò, I., De Stefani, D., and Rizzuto, R. (2014). MICU1 and MICU2 finely tune the mitochondrial Ca<sup>2+</sup> uniporter by exerting opposite effects on MCU activity. *Mol. Cell* *53*, 726–737.
- Schappe, M.S., Sztayn, K., Stremaska, M.E., Mendu, S.K., Downs, T.K., Seegen, P.V., Mahoney, M.A., Dixit, S., Krupa, J.K., Stipes, E.J., et al. (2018). Chanzyme TRPM7 mediates the Ca<sup>2+</sup> influx essential for lipopolysaccharide-induced Toll-like receptor 4 endocytosis and macrophage activation. *Immunity* *48*, 59–74.e55.
- Strijbis, K., Tafesse, F.G., Fairn, G.D., Witte, M.D., Dougan, S.K., Watson, N., Spooner, E., Esteban, A., Vyas, V.K., Fink, G.R., et al. (2013). Bruton's tyrosine kinase (BTK) and Vav1 contribute to Dectin1-dependent phagocytosis of *Candida albicans* in macrophages. *PLoS Pathog.* *9*, e1003446.
- Suzuki, J., Kanemaru, K., Ishii, K., Ohkura, M., Okubo, Y., and Iino, M. (2014). Imaging intraorganelle Ca<sup>2+</sup> at subcellular resolution using CEPIA. *Nat. Commun.* *5*, 4153.
- Uwamahoro, N., Verma-Gaur, J., Shen, H.H., Qu, Y., Lewis, R., Lu, J., Bambery, K., Masters, S.L., Vince, J.E., Naderer, T., and Traven, A. (2014). The pathogen *Candida albicans* hijacks pyroptosis for escape from macrophages. *MBio* *5*, e00003–e00014.
- Wallrabe, H., Svindrych, Z., Alam, S.R., Siller, K.H., Wang, T., Kashatus, D., Hu, S., and Periasamy, A. (2018). Segmented cell analyses to measure redox states of autofluorescent NAD(P)H, FAD & Trp in cancer cells by FLIM. *Sci. Rep.* *8*, 7.
- Wang, A., Luan, H.H., and Medzhitov, R. (2019). An evolutionary perspective on immunometabolism. *Science* *363*, 363.
- West, A.P., Brodsky, I.E., Rahner, C., Woo, D.K., Erdjument-Bromage, H., Tempst, P., Walsh, M.C., Choi, Y., Shadel, G.S., and Ghosh, S. (2011). TLR signalling augments macrophage bactericidal activity through mitochondrial ROS. *Nature* *472*, 476–480.
- Williams, N.C., and O'Neill, L.A.J. (2018). A role for the Krebs cycle intermediate citrate in metabolic reprogramming in innate immunity and inflammation. *Front. Immunol.* *9*, 141.
- Zhao, H., Li, T., Wang, K., Zhao, F., Chen, J., Xu, G., Zhao, J., Li, T., Chen, L., Li, L., et al. (2019). AMPK-mediated activation of MCU stimulates mitochondrial Ca<sup>2+</sup> entry to promote mitotic progression. *Nat. Cell Biol.* *21*, 476–486.

STAR★METHODS

KEY RESOURCES TABLE

| REAGENT or RESOURCE                                                                         | SOURCE                    | IDENTIFIER                                            |
|---------------------------------------------------------------------------------------------|---------------------------|-------------------------------------------------------|
| <b>Antibodies</b>                                                                           |                           |                                                       |
| Anti-Pyruvate Dehydrogenase E1-alpha subunit antibody [9H9AF5]                              | Abcam                     | Abcam Cat# ab110330, RRID:AB_10858459                 |
| Recombinant Anti-Pyruvate Dehydrogenase E1-alpha subunit (phospho S293) antibody [EPR12200] | Abcam                     | Abcam Cat# ab177461, RRID:AB_2756339                  |
| Anti-MCU antibody                                                                           | Abcam                     | Cat#ab121499                                          |
| Tom20 (D8T4N) Rabbit mAb                                                                    | Cell Signaling Technology | Cell Signaling Technology Cat# 42406, RRID:AB_2687663 |
| Pyruvate Dehydrogenase (C54G1) Rabbit mAb                                                   | Cell Signaling Technology | Cell Signaling Technology Cat# 3205, RRID:AB_2162926  |
| <b>Bacterial and Virus Strains</b>                                                          |                           |                                                       |
| pCMV-CEPIA3mt                                                                               | Suzuki et al.             | Addgene Cat#58219, RRID: addgene_58219                |
| Lenti-X Packaging Single Shots (VSV-G)                                                      | Takara                    | Cat#631275                                            |
| <b>Chemicals, Peptides, and Recombinant Proteins</b>                                        |                           |                                                       |
| Carbonyl cyanide 4-(trifluoromethoxy) phenylhydrazone (FCCP)                                | Sigma                     | Cat# C2920-10MG                                       |
| JC-1 Dye (Mitochondrial Membrane Potential Probe)                                           | ThermoFisher Scientific   | Cat#T3168                                             |
| Calcium Green-5N, Hexapotassium Salt, cell impermeant                                       | ThermoFisher Scientific   | Cat#C3737                                             |
| Fura-2, AM, cell permeant                                                                   | ThermoFisher Scientific   | Cat#F1221                                             |
| Probenecid                                                                                  | Enzo                      | Cat# ALX-430-113-G005                                 |
| Pluronic F-127 (20% solution in DMSO)                                                       | ThermoFisher Scientific   | Cat#P3000MP                                           |
| Ionomycin                                                                                   | Cayman Chemical           | Cat#10004974                                          |
| MitoTracker Red                                                                             | ThermoFisher Scientific   | Cat#M22425                                            |
| CypHer5E NHS Ester                                                                          | GE healthcare             | Cat#PA15401                                           |
| BAM15                                                                                       | Cayman Chemical           | Cat#17811                                             |
| Antimycin A                                                                                 | Sigma                     | Cat# A8674-25MG                                       |
| Rotenone                                                                                    | Sigma                     | Cat#R8875-1G                                          |
| Zyosan A S. cerevisiae BioParticles, Texas Red conjugate                                    | ThermoFisher Scientific   | Cat#Z2843                                             |
| Zyosan A S. cerevisiae BioParticles, unlabeled                                              | ThermoFisher Scientific   | Cat#Z2849                                             |
| Dorsomorphin dihydrochloride                                                                | Tocris                    | Cat#3093                                              |
| 6-Aminonicotinamide                                                                         | Cayman Chemical           | Cat#10009315                                          |
| 6,8-Bid(benzylthio)octanoic acid                                                            | Tocris                    | Cat#5348                                              |
| BAPTA-AM, cell permeant chelator                                                            | ThermoFisher Scientific   | Cat#B6769                                             |
| Beta-glucan peptide                                                                         | Invivogen                 | Cat#tlrl-bgp                                          |
| Thapsigargin                                                                                | ThermoFisher Scientific   | Cat#T7458                                             |
| <b>Critical Commercial Assays</b>                                                           |                           |                                                       |
| CellTiter-Glo® 2.0 Cell Viability Assay                                                     | Promega                   | Cat#G9241                                             |
| CellTrace Violet Cell Proliferation Kit, for flow cytometry                                 | ThermoFisher Scientific   | Cat#C34557                                            |

(Continued on next page)

**Continued**

| REAGENT or RESOURCE                                                            | SOURCE                                                                      | IDENTIFIER                                                                                                                                                                              |
|--------------------------------------------------------------------------------|-----------------------------------------------------------------------------|-----------------------------------------------------------------------------------------------------------------------------------------------------------------------------------------|
| CellTrace Yellow Cell Proliferation Kit, for flow cytometry                    | ThermoFisher Scientific                                                     | Cat#C34567                                                                                                                                                                              |
| CellROX Green Reagent, for oxidative stress detection                          | ThermoFisher Scientific                                                     | Cat#C10444                                                                                                                                                                              |
| Pierce LDH Cytotoxicity Assay Kit                                              | ThermoFisher Scientific                                                     | Cat#88953                                                                                                                                                                               |
| Experimental Models: Cell Lines                                                |                                                                             |                                                                                                                                                                                         |
| RAW264.7 ATCC TIB-71                                                           | ATCC                                                                        | ATCC Cat# TIB-71, RRID:CVCL_0493                                                                                                                                                        |
| Experimental Models: Organisms/Strains                                         |                                                                             |                                                                                                                                                                                         |
| <i>S. cerevisiae</i> sy1022 fy5                                                | This paper                                                                  | Gift: Jeff Smith (UVA)                                                                                                                                                                  |
| Culti-Loops Candida albicans ATCC 10231                                        | ThermoFisher Scientific                                                     | Cat#R4601503                                                                                                                                                                            |
| Mouse: B6;129S- <i>Mcu</i> <sup>tm1.1Jmol/J</sup>                              | The Jackson Laboratory                                                      | IMSR Cat# JAX:029817, RRID:IMSR_JAX:029817                                                                                                                                              |
| Mouse: B6J.B6N(Cg)- <i>Cx3cr1</i> <sup>tm1.1(cre)/Jung/J</sup>                 | The Jackson Laboratory                                                      | IMSR Cat# JAX:025524, RRID:IMSR_JAX:025524                                                                                                                                              |
| Oligonucleotides                                                               |                                                                             |                                                                                                                                                                                         |
| MCU Exon 5 Forward Primer<br>5'-TGAACGACGTGAAGACCCTG-3'                        | This Paper                                                                  | N/A                                                                                                                                                                                     |
| MCU Exon 5 Reverse Primer<br>5'-TTCGTACCTTCTCCAGGGGG-3'                        | This Paper                                                                  | N/A                                                                                                                                                                                     |
| Software and Algorithms                                                        |                                                                             |                                                                                                                                                                                         |
| ImageJ                                                                         |                                                                             | <a href="https://imagej.nih.gov/ij/">https://imagej.nih.gov/ij/</a>                                                                                                                     |
| SPCM                                                                           | Wallrabe et al., 2018                                                       | <a href="https://www.becker-hickl.com/products/spcm/">https://www.becker-hickl.com/products/spcm/</a>                                                                                   |
| Graphpad Prism                                                                 | GraphPad Prism                                                              | <a href="https://www.graphpad.com/scientific-software/prism/">https://www.graphpad.com/scientific-software/prism/</a>                                                                   |
| Seahorse Wave                                                                  | Agilent                                                                     | <a href="https://www.agilent.com/en/products/cell-analysis/software-download-for-wave-desktop">https://www.agilent.com/en/products/cell-analysis/software-download-for-wave-desktop</a> |
| Other                                                                          |                                                                             |                                                                                                                                                                                         |
| CFX Connect Real-Time system (Bio-Rad)                                         | qPCR                                                                        | N/A                                                                                                                                                                                     |
| XF24 Extracellular Flux Analyzer (Agilent Technologies)                        | Seahorse                                                                    | N/A                                                                                                                                                                                     |
| FlexStation 3                                                                  | <i>In vitro</i> mitochondrial Ca <sup>2+</sup> uptake, LDH assay, ATP assay | N/A                                                                                                                                                                                     |
| Leica SP5 X Confocal/Spectral Imaging Microscopy System with White Light Laser | Live mCa <sup>2+</sup> imaging for RAW-3mt                                  | N/A                                                                                                                                                                                     |
| Zeiss Axio Observer with DG4 Illuminator and ORCA-Flash 4.0 V2 CMOS camera     | Fura-2 Ca <sup>2+</sup> imaging                                             | N/A                                                                                                                                                                                     |
| LSM880 confocal and a Chameleon multiphoton light source                       | Immunofluorescence                                                          | N/A                                                                                                                                                                                     |
| Attune NxT equipped with four lasers (488nm, 640nm, 405nm, and 561nm)          | Flow Cytometry                                                              | N/A                                                                                                                                                                                     |
| JEOL 1230 Transmission Electron Microscope                                     | TEM                                                                         | N/A                                                                                                                                                                                     |
| FUIJ Film LAS-4000                                                             | Western Blotting                                                            | N/A                                                                                                                                                                                     |

**RESOURCE AVAILABILITY**

**Lead Contact**

Further information and requests for resources and reagents should be directed to and will be fulfilled by the Lead Contact, Bimal N. Desai: [bdesai@virginia.edu](mailto:bdesai@virginia.edu)

### Materials Availability

All unique/stable reagents generated in this study are available from the Lead Contact with a completed Materials Transfer Agreement.

### Data and Code Availability

Requests for data should be directed to Lead Contact, Bimal Desai. Data will be made available upon request.

## EXPERIMENTAL MODEL AND SUBJECT DETAILS

### Mouse Strains

Male and female mice aged 7 to 14 weeks were used for all experiments. *Mcu(M)fl/fl* Cx3cr1 cre mice were generated by crossing B6;129S-Mcutm1.1Jmol/J (Jackson Laboratories; 029817) mice to B6J.B6N(Cg)-Cx3cr1tm1.1(cre)Jung/J (Jackson Laboratories; 025524). Genotyping of *Mcu(M)fl/fl* was performed using Jax genotyping protocols for B6J.B6N(Cg)-Cx3cr1tm1.1(cre)Jung/J and B6;129S-Mcutm1.1Jmol/J strains. Genetic deletion was confirmed using quantitative real-time PCR analysis, western blot analysis, and mitochondrial  $Ca^{2+}$  uptake assays on isolated mitochondria. Mice were housed and bred in accordance with policies and procedures of the University of Virginia Institutional Animal Care and Use Committee (IACUC).

### Cell lines and Cell Culture

The complete list of cell lines used in this study are given in the [Key Resources Table](#). All cell lines were grown at 37°C 5% CO<sub>2</sub> and maintained according to ATCC guidelines. Bone marrow-derived macrophages (BMDMs) were isolated and cultured as previously described ([Schappe et al., 2018](#)). In brief, bone marrow was extracted from mouse femur and tibia via centrifugation. The RBCs were lysed with ACK lysis buffer and the remaining cells were counted and plated on Petri dishes at a density of 2–4x10<sup>6</sup> cells/plates in BMDM Media (RPMI 1640 + 10% FBS + 20% L929-conditioned media). Cells were differentiated for 7 days and media was replaced every 3 days. For experiments BMDMs were used between days 9–14 post-harvest. RAW264.7 cell line (ATCC TIB-71) was maintained according to ATCC guidelines.

## METHOD DETAILS

### Ca<sup>2+</sup> Channel siRNA screen

RAW264.7 cells were collected and aliquoted into individual cell suspension for each siRNA target. RAW264.7 cells were resuspended in OptiMem (ThermoFisher; 31985062) with 10 nM siRNA (Dharmacon) and Lipofectamine 3000 (ThermoFisher; L3000015), according to manufacturer's instructions. Cells were plated at 0.5x10<sup>6</sup> cells/mL in 6-well tissue culture treated plates for 48 h. After 48 h, cells were washed 3X with HBSS and detached by gentle scraping. Cells were then counted and 0.5x10<sup>6</sup> cells were aliquoted into individual tubes for each siRNA target and resuspended in siRNA mix as described above. Cells were plated at 0.1x10<sup>6</sup> cells/well in 24-well tissue culture treated plate for another 48h. A single colony of *C. albicans* was grown overnight at 30°C in 5 mL YPD broth. On the day of the experiment, *C. albicans* were washed 3X in complete media and counted using OD600. *C. albicans* were resuspended in complete media at desired multiplicity of infection (MOI = 1). RAW264.7 cells were washed 3X with HBSS and *C. albicans* were added to each well at MOI1 in 100uL complete media. RAW cells were incubated with *C. albicans* for 30 minutes at 37°C 5% CO<sub>2</sub>. After 30 minutes, cells were washed 3X with HBSS to remove non-engulfed *C. albicans* and resuspended in complete media. One plate of cells was harvested at this 30-minute time point and lysed in sterile diH<sub>2</sub>O for 30 minutes before being serially diluted and plated on YPD agar plates for T0 colony forming units (CFUs). Remaining cells were grown for 8h (T2). Cells were harvested as described above. Percent killing was calculated by the formula (T0–T2)/(T0)\*100. Gene knockdown was confirmed via quantitative real-time PCR. Z-scores were calculated as the difference in percent killing between siRNA and siScramble-treated cells for a given siRNA target, divided by the standard deviation of the dataset; z-scores across the experiment were then averaged and plotted as shown.

### In vivo (mouse) disseminated candidiasis model

*In vivo* candidiasis was performed as described ([Conti et al., 2014](#)). In brief, WT and *Mcu(M)–/–* mice (ages between 7–12 weeks) were tail vein injected with 100 μL of 1x10<sup>6</sup> viable *C. albicans*. Mice were monitored every 3 h for first 24 h and every 6 h for remainder of the study for disease symptoms using a blinded clinical score system ([Supplemental Methods S1](#)). Mice were euthanized at humane endpoints: > 25% loss in body weight or > 7 clinical score for two consecutive time points. Mice kidneys and livers were harvested for CFU analysis and histology. Serum was analyzed by Flow Cytometry for luminex analysis.

### Isolation of mitochondria

Bone-marrow derived macrophages from WT and *Mcu–/–* mice were lysed in IB++ buffer (100 mM KCl, 50 mM Tris–HCl pH 7.4, 2 mM EDTA–KOH pH 7.4, 0.5% fatty acid-free BSA, 1X protease inhibitors (Roche)). Lysates were homogenized at 4°C using a dounce homogenizer. Whole cell fraction was spun at 600xg for 10 min at 4°C. Supernatant was transferred to prechilled Eppendorf tubes and centrifuged at 8000xg for 10 min at 4°C. Mitochondria were resuspended in IB++ w/o BSA for BCA.

### Killing assays

RAW264.7 and BMDM cells were incubated with *C. albicans* or *S. cerevisiae* for 30 min (37°C, 5% CO<sub>2</sub>). After 30 min, cells were washed 3X with HBSS to remove non-engulfed fungus and resuspended in complete media. One plate of cells was harvested at this 30 min time point and lysed in sterile distilled H<sub>2</sub>O for 30 min before being serially diluted and plated on YPD agar plates for T0 colony forming units (CFUs). Remaining cells were co-incubated with *C. albicans* for indicated times (T2). *C. albicans* percent survival was calculated by the formula (T2/T0)\*100.

### In vitro Mitochondrial Ca<sup>2+</sup> uptake assay

Crude mitochondria from WT and *Mcu-/-* macrophages were diluted to 1 mg/mL in RB++ (137 mM KCl, 10 mM HEPES-KOH, 2.5 mM MgCl<sub>2</sub>, 3 mM KH<sub>2</sub>PO<sub>4</sub>, 25 μM EDTA, 5 mM Succinate, 5 mM glutamate, 5 mM malate and 0.4 nM Ca<sup>2+</sup> Green-5N (pH = 7.4) and added to a 96-well glass bottom black wall plate (CellVis, Cat#P96-1-N). Mitochondrial Ca<sup>2+</sup> uptake was recorded on a FlexStation 3 with excitation/emission 515/530nm. 45 μM CaCl<sub>2</sub> was injected at indicated time point. Fluorescence was recorded every 2 s for the duration of experiment.

### Preparation of fungal aqueous extracts

Single colonies of *C. albicans* or *S. cerevisiae* were grown overnight in 5mL of YPD at 30°C. Cells were washed 3x in BMDM Media (RPMI 1640 + 10% FBS + 20% L929-conditioned media). Cells were counted using OD600 and normalized to 4x10<sup>7</sup> cells/mL and incubated at 4°C overnight. The following day cells were heat-killed at 95°C for 30 min and centrifuged at 10000xg for 10 min to pellet cell debris. The resulting supernatants (*C. albicans* extracts) was at 5X concentration for experiments and used to stimulate macrophages for indicated experiments.

### LDH Release Assay

BMDM cells were incubated with *C. albicans* for 30 min at 37°C, 5% CO<sub>2</sub>. After 30 min, cells were washed 3X with HBSS to remove un-engulfed *C. albicans* and resuspended in complete media. After 6 h, LDH was measured in the supernatants and Triton-X-treated positive controls. For zymosan treatment, cells were stimulated with zymosan (2:1, particles:cell) for 6 h before measuring LDH in the resulting supernatant. LDH was measured with Pierce™ LDH Cytotoxicity Assay Kit (ThermoScientific) according to manufacturer instructions using a Flexstation 3 plate reader.

### Generation of RAW3mt stable cell line

RAW264.7 macrophages were transduced with CEPIA3mt lentivirus and seeded on 6-well tissue culture treated plates. Transduced cells were replenished with Selection Media (DMEM + 10% FBS + 1mg/mL puromycin) every 24h for 10 days. Surviving cells were counted and single cell cloned on 96 well plates. Single colonies were selected for validation of CEPIA3mt protein and Ca<sup>2+</sup> sensitivity.

### Live cell mitochondrial Ca<sup>2+</sup> imaging during zymosan phagocytosis

RAW3mt cells were plated overnight on coverslips prior to imaging. Coverslips were washed 1x in Ringer Solution (155 mM NaCl, 4.5 mM KCl, 2 mM CaCl<sub>2</sub>, 1 mM MgCl<sub>2</sub>, 5 mM HEPES, 10 mM D-glucose) and placed in the imaging chamber. Coverslips were imaged at 37°C ± 1°C. Microscopy was performed with an open pinhole on the Leica SP5 microscope with excitation from 'white light' and 488 nm argon lasers using Leica Applycate Suite Software (Leica). The images were processed using ImageJ software. Texas Red-conjugated zymosan A *S. cerevisiae* Bioparticles (ThermoFisher; Z2843) were fed to macrophages on coverslips and imaged for phagocytosis. "Whole cell mCa<sup>2+</sup>" was analyzed by drawing ROIs around individual cells during zymosan phagocytosis. For measurements of PPMiCa response, data analysis was performed as described in Extended Figure 5B.

### Transmission Electron Microscopy (TEM)

BMDMs were seeded onto 13 mm diameter Thermanox plastic coverslips (EMS; #72280) at 0.1x10<sup>6</sup> cell per well in a 24-well plate. *C. albicans* and Zymosan were fed for 30 min (37°C, 5% CO<sub>2</sub>). After 30 min, cells were washed 3X with HBSS to remove un-engulfed *C. albicans* and resuspended in complete media. Cells were then cultured for indicated times before fixation (4% PFA and 2.5% EM-grade glutaraldehyde). Samples were submitted to the Advanced Microscopy Facility Core (UVA), where they were stained and cut for imaging on JOEL 1230 TEM.

### Cytosolic Ca<sup>2+</sup> imaging using ratiometric Fura-2

For ratiometric Ca<sup>2+</sup> imaging, macrophages were incubated for 30 min with gentle agitation at RT with 5 μM Fura-2-AM, 0.02% of pluronic acid and 500 μM probenecid in Ringer solution ([in mM] 155 NaCl, 4.5 KCl, 2 CaCl<sub>2</sub>, 1 MgCl<sub>2</sub>, 5 HEPES, 10 glucose, pH 7.4). Fura-2 emissions were collected at 510 nm and with 340/380 nm excitation. Excitation was performed using a DG4 Illuminator (Sutter Instruments) and fluorescence was detected using an ORCA-Flash 4.0 V2 CMOS camera (Hamamatsu) using SlideBook 6 software. Cells were imaged every 10 s for the duration of the experiment. *C. albicans* extracts and ionomycin were perfused at indicated times.



### ATP Measurements

BMDM cells were plated at  $2 \times 10^5$  cells per well in a 96-well plate overnight (~16 h). On the day of the experiment, the wells were treated in triplicate for indicated times with zymosan (2:1, particles:cell). Cells were lysed and ATP was measured using the Cell-Titer-Glo® Luminescent cell viability assay (Promega) according to manufacturer's instruction.

### Flow cytometry

BMDMs were plated at  $4 \times 10^5$  cells per well in a 12-well non-tissue culture treated plate overnight (~16 h). A single colony of *C. albicans* was grown overnight at 30°C in 5mL YPD broth. On the day of the experiment, *C. albicans* were washed 3X in complete media and counted using OD600. *C. albicans* were resuspended in complete media at desired multiplicity of infection (MOI = 1). *C. albicans* were washed in 3X in HBSS (w/  $Mg^{2+}$  and  $Ca^{2+}$ ) and stained with 10  $\mu$ M CellTrace dye and/or 10  $\mu$ M CellRox dye, 2  $\mu$ M CypHer5E dye for 45 min at 37°C and 5%  $CO_2$ . Labeled *C. albicans* were washed 3X in complete media and added to macrophages. Cells were centrifuged for 5 min at 500 xg to facilitate macrophage phagocytosis. Macrophages were incubated with labeled *C. albicans* for 30 min (37°C, 5%  $CO_2$ ). After 30 min, cells were washed 3X with HBSS to remove un-engulfed *C. albicans* and resuspended in complete media. Macrophages were then incubated for indicated times. Prior to flow cytometry, cells were detached from wells using 0.25% trypsin + EDTA, washed 2X with HBSS and analyzed using Attune NxT flow cytometer. CellTrace violet was detected using the 405nm laser with bandpass filter 440/50. CellRox was detected using 488nm laser with bandpass filter 530/30. CypHer was detected using 640nm laser with bandpass filter 670/14. Macrophages exposed to unlabeled yeast were used for gating controls. Gating strategies are shown in the extended figures.

### Mitochondrial ROS

BMDMs were plated into a 96-well plate at a 200,000 cells per well. Cells were stained with MitoSox according to manufacturer's protocol and imaged using the FlexStation 3 (Molecular Devices). Zymosan or vehicle control was added to the wells prior to imaging. MitoSox fluorescence intensity was measured every 5 min (Ex/ Em 510/580) for 1 hour.

### Fluorescence Lifetime Imaging (FLIM) Microscopy

For imaging BMDMs, cells were plated on 25 mm round #1.5 glass coverslips (overnight) to obtain 70%–90% confluence. Cells were washed 1X in Ringer Solution (155 mM NaCl, 4.5 mM KCl, 2 mM  $CaCl_2$ , 1 mM  $MgCl_2$ , 5 mM HEPES, 10 mM D-glucose) and placed in imaging chamber at  $37^\circ C \pm 1^\circ C$  for imaging. Baseline NAD(P)H was monitored followed by the addition of *C. albicans* extract. NAD(P)H lifetime was monitored for indicated times. Cells were imaged on a Zeiss LSM-780 NLO confocal/multiphoton microscopy system with Chameleon Vission-II (Coherent Inc.) ultrafast Ti:sapphire laser with dispersion compensation (W.M. Keck Center UVA). Channel 2 460-500nm was used to collect NAD(P)H signal. Time-resolved fluorescence is recorded in Time correlated single photon counting (TCSPC) mode (256 X 256) using a Becker-Hickl TCSPC module and SPCM (9.74) acquisition software. Note that TCSPC is a highly sensitive technique for recording low-level light signals with high time resolution and high precision but the spatial resolution is low (256 X 256).

### Seahorse Assays

Extracellular flux assays were performed on the XF24 Extracellular Flux Analyzer (Agilent Technologies). Cells were plated at a density of  $1 \times 10^5$  cells per well overnight (~16h, 37°C, 5%  $CO_2$ ). At beginning of the experiment, assay media was changed to DMEM containing pyruvate (Thermo-Fisher Cat#12800017; pH = 7.35 at 37°C) and cells were equilibrated for 30 min. OCR (pmol  $O_2$ /min) was measured every 5 min for the first hour of recording and then changed to 15 min intervals for the remainder of experiment (indicated by gray bar on figure). Zymosan (2:1 particles:cell) particles were injected following 3 baseline measurements of OCR. To measure maximal OCR, 2  $\mu$ M BAM15 was injected at the indicated time point. Antimycin A (1  $\mu$ M) and Rotenone (100 nM) were injected at the end of experiment. Respiration was calculated by subtracting the average of the post-Antimycin A and Rotenone measurements from the recorded measurements.

### Immunofluorescence

Cells were plated overnight on coverslips prior to experiments. Following treatments, coverslips were washed 3x in PBS to remove media and loose/non-adherent cells. Coverslips were fixed in 4% PFA (30 min, RT). Coverslips were washed 3X in wash buffer (PBS with 0.05% Tween-20), blocked and permeabilized at RT for 1 h in B/P buffer (2.5% donkey serum, 2.5% goat serum, 1% BSA, 0.1% fish gelatin, 0.1% Triton X-100, and 0.05% Tween-20 in PBS), and then incubated with primary antibody diluted in B/P buffer overnight at 4°C. Coverslips were washed 3X in wash buffer and incubated at RT with the appropriate secondary antibody in B/P buffer for 2 h, followed by 3X washes in wash buffer. Coverslips were mounted on glass slides (ProLong Gold Antifade; ThermoFisher #P36930), stored in a desiccated box at 4°C and imaged within 48h. Confocal microscopy was performed on Zeiss LSM880. Data were acquired with Zen Black and analyzed using ImageJ.

### Metabolomics

Confluent 12-cm plates of bone-marrow derived macrophages were used for each condition with 3-5 replicates per condition. Cells were plated overnight prior to experiment. On the day of the experiment, plates were stimulated with zymosan (2:1 particles:cell) or

vehicle control for indicated time points (3 hours or 6 hours). Following stimulation, cells were washed 3X in HBSS and packed into 50-100 $\mu$ L pellets by centrifugation at 1000 xg for 5 min. Cells were resuspended in HBSS and transferred to pre-labeled 2.0 mL polypropylene tubes. Cells were centrifuged at 1000 xg for 5 min. Supernatant was removed and pellets were flash frozen in liquid nitrogen and stored at  $-80^{\circ}\text{C}$  until shipped to Metabolon Inc. for analysis. MetaboAnalyst was used for data processing and visualization. Volcano plots were generated in Graphpad Prism by plotting the  $-\log(p \text{ value})$  relative to the  $\text{Log}_{10}$  (fold change) for individual metabolites.

## QUANTIFICATION AND STATISTICAL ANALYSIS

### Statistics

All data were analyzed using Excel (Microsoft) and GraphPad Prism 8 (GraphPad) software. Data are presented as means with error bars which reflect standard error of the mean (SEM) as indicated in figure legends. Statistical significance ( $p < 0.05$ ) was computed using one-way ANOVA, 2-way ANOVA, and welch's t test (two-tailed) as indicated in figure legends. Survival curves were analyzed using Kaplan-Meier method and statistical significance ( $p < 0.05$ ) was computed using Log-rank (Mantel-Cox) test. The sample size and representation of 'n' (mice, experimental repeats, or cells) is indicated in figure legends.

**Cell Reports, Volume 33**

**Supplemental Information**

**Mitochondrial Ca<sup>2+</sup> Signaling Is an  
Electrometabolic Switch to Fuel Phagosome Killing**

**Philip V. Seegren, Taylor K. Downs, Marta E. Stremaska, Logan R. Harper, Ruofan Cao, Rachel J. Olson, Clint M. Upchurch, Catherine A. Doyle, Joel Kennedy, Eric L. Stipes, Norbert Leitinger, Ammasi Periasamy, and Bimal N. Desai**

**Figure S1. Characterization of *Mcu*<sup>-/-</sup> macrophages at baseline (with Fig. 1)**

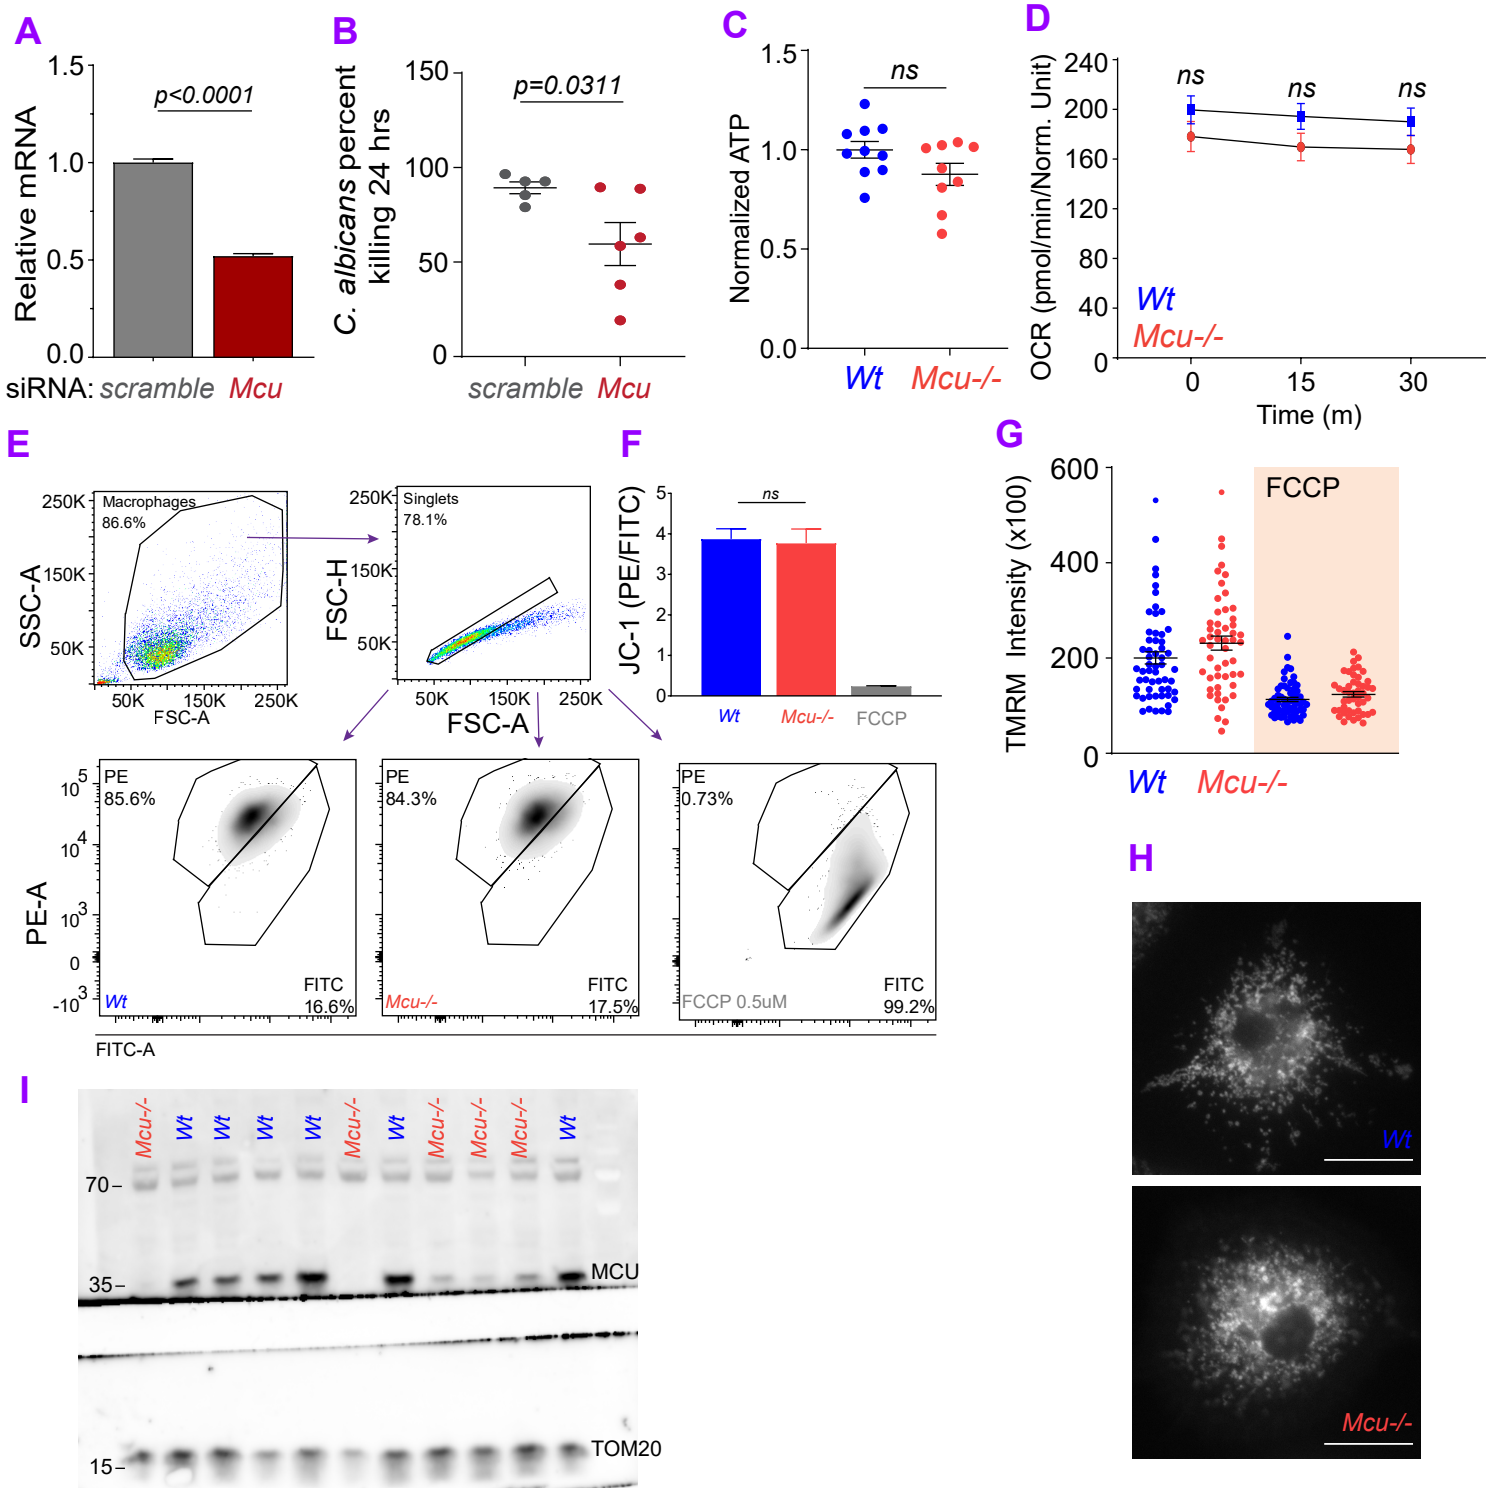

## Figure S1. Characterization of *Mcu*<sup>-/-</sup> macrophages at baseline (with Fig. 1)

- A.** Gene expression analysis (qPCR) of *Mcu* mRNA in *scrambled* (n=3) and *Mcu* knockdown (n=3) RAW264.7 cells. Error bars represent SEM;  $p < 0.0001$  according to Welch's t test, two-tailed
- B.** *C. albicans* killing by BMDMs transfected with *scrambled* (n=5) and *Mcu* siRNA (n=6). Error bars represent SEM;  $p = 0.0311$  according to Welch's t test, two-tailed.
- C.** Normalized ATP levels in *wt* (n=10) and *Mcu*<sup>-/-</sup> (n=10) BMDMs. Error bars represent SEM of six independent experiments. No significant difference detected between *wt* and *Mcu*<sup>-/-</sup> according to Welch's t test, two-tailed.
- D.** Oxygen consumption rates (OCR) measured by Seahorse Analyzer across 30 min in *wt* (n=5) and *Mcu*<sup>-/-</sup> (n=5) BMDMs. Error bars represent SEM; no significant difference detected between *wt* and *Mcu*<sup>-/-</sup> according to Ordinary one-way ANOVA with multiple comparisons.
- E.** Gating strategy for flow cytometry of JC-1 dye. Viable Singlet BMDMs were gated prior to quantification of JC1 fluorescence in FITC and PE channels. Maximum mitochondrial depolarization was achieved by pretreating the BMDMs with FCCP (1 $\mu$ M) for 15 min prior to analysis.
- F.** JC-1 PE:FITC ratio calculated for *wt* (n=4) and *Mcu*<sup>-/-</sup> (n=4) BMDMs. Error bars represent SEM; no significant difference was detected between *wt* and *Mcu*<sup>-/-</sup> according to Welch's t test, two-tailed.
- G.** Quantification of TMRM (mitochondrial membrane potential dye) intensity in *wt* and *Mcu*<sup>-/-</sup> macrophages at baseline. FCCP (1  $\mu$ M) was added to show maximum depolarization. No significant difference detected between *wt* and *Mcu*<sup>-/-</sup> according to Welch's t test, two-tailed.
- H.** Representative images from *wt* and *Mcu*<sup>-/-</sup> macrophages stained with TMRM (mitochondrial membrane potential dye). Cells were imaged every 10s. Baseline fluorescence was measured for 1 min followed by the addition of FCCP (1  $\mu$ M). Scale bar is 6  $\mu$ m.
- I.** Western blot of MCU and TOM20 in *wt* and *Mcu*<sup>-/-</sup> BMDMs.



**Figure S2. RAW3mt validation, and analysis of PPMiCa Responses (with Fig. 4)**

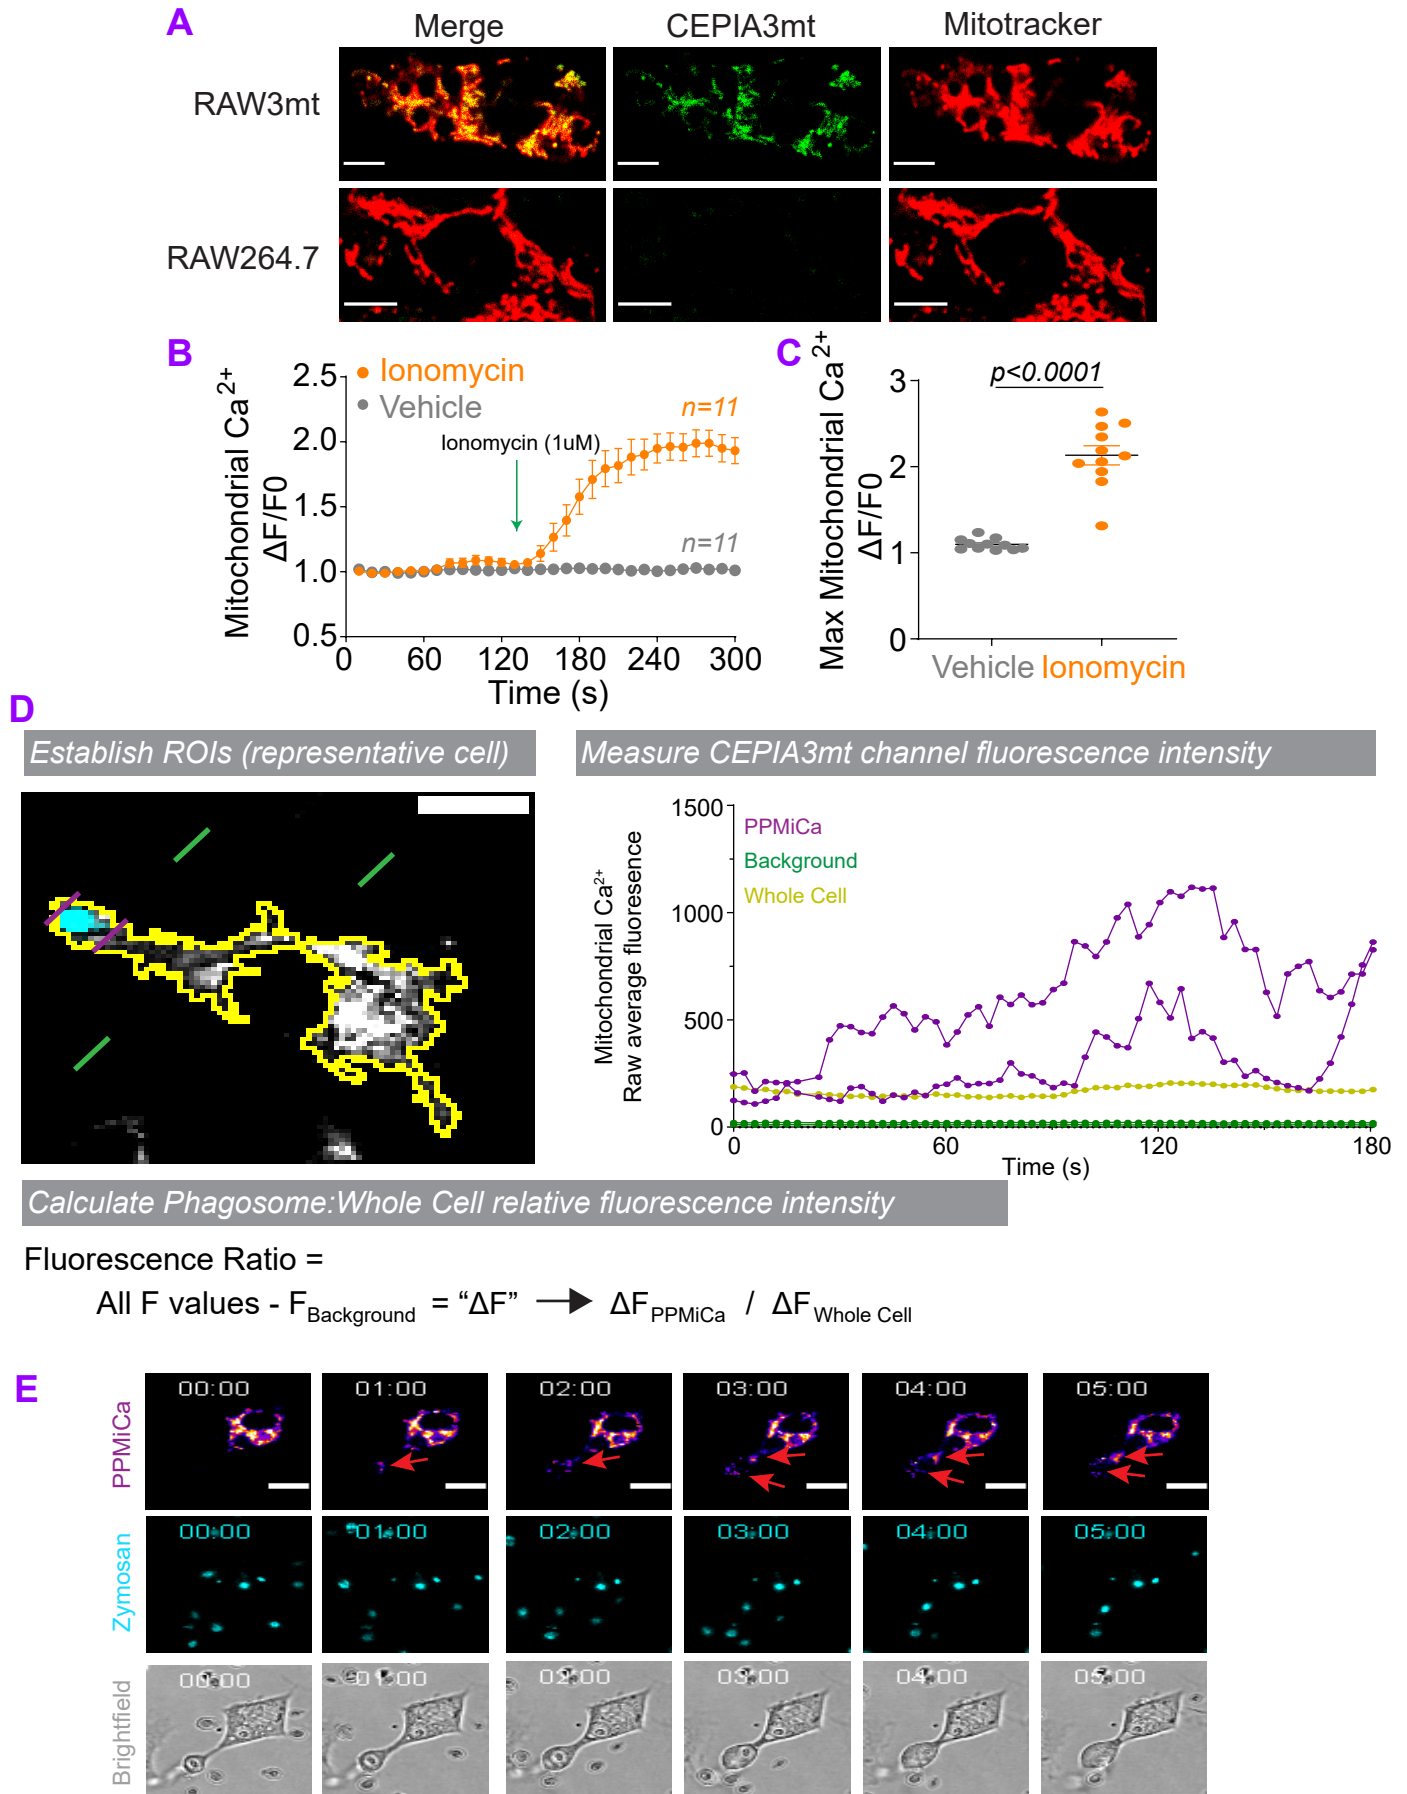

## Figure S2. RAW3mt validation, and analysis of PPMiCa responses (with Fig. 4)

**A.** RAW3mt and RAW264.7 macrophages stained with MitoTracker Red (200 nM) and analyzed on confocal microscopy. Scale bar is 5  $\mu\text{m}$ .

**B.** Whole cell  $\text{mCa}^{2+}$  elevations from ionomycin (1  $\mu\text{M}$ ) stimulated RAW3mt macrophages. Whole cell  $\text{mCa}^{2+}$  is taken from the average fluorescence intensity of ROIs drawn over entire mitochondrial network (See extended Figure 5). These values are calculated as a change in fluorescence/initial fluorescence ( $\Delta F/F_0$ ). RAW3mt cells were imaged every 10 seconds; error bars represent SEM.

**C.** Quantification of peak whole cell  $\text{mCa}^{2+}$  elevations from FigureS2B Error bars represent SEM;  $p < 0.0001$  according to Welch's t test, two-tailed.

**D.** Representative analysis for PPMiCa and whole cell  $\text{mCa}^{2+}$  responses in RAW3mt. Note the entire mitochondrial network in the ROI. Scale bar is 10  $\mu\text{m}$ .

**E.** Representative time course of PPMiCa responses in RAW3mt. *Red* arrows indicated PPMiCa responses near phagosome. CEPIA3mt (top images; Fire LUT), Zymosan (middle; cyan LUT), and brightfield (bottom image; grey LUT) were acquired using confocal microscopy (sampling rate: 1 frame/10s). Scale bar is 10  $\mu\text{m}$ .

Figure S3. Gating strategy for flow cytometry (with Fig. 5)

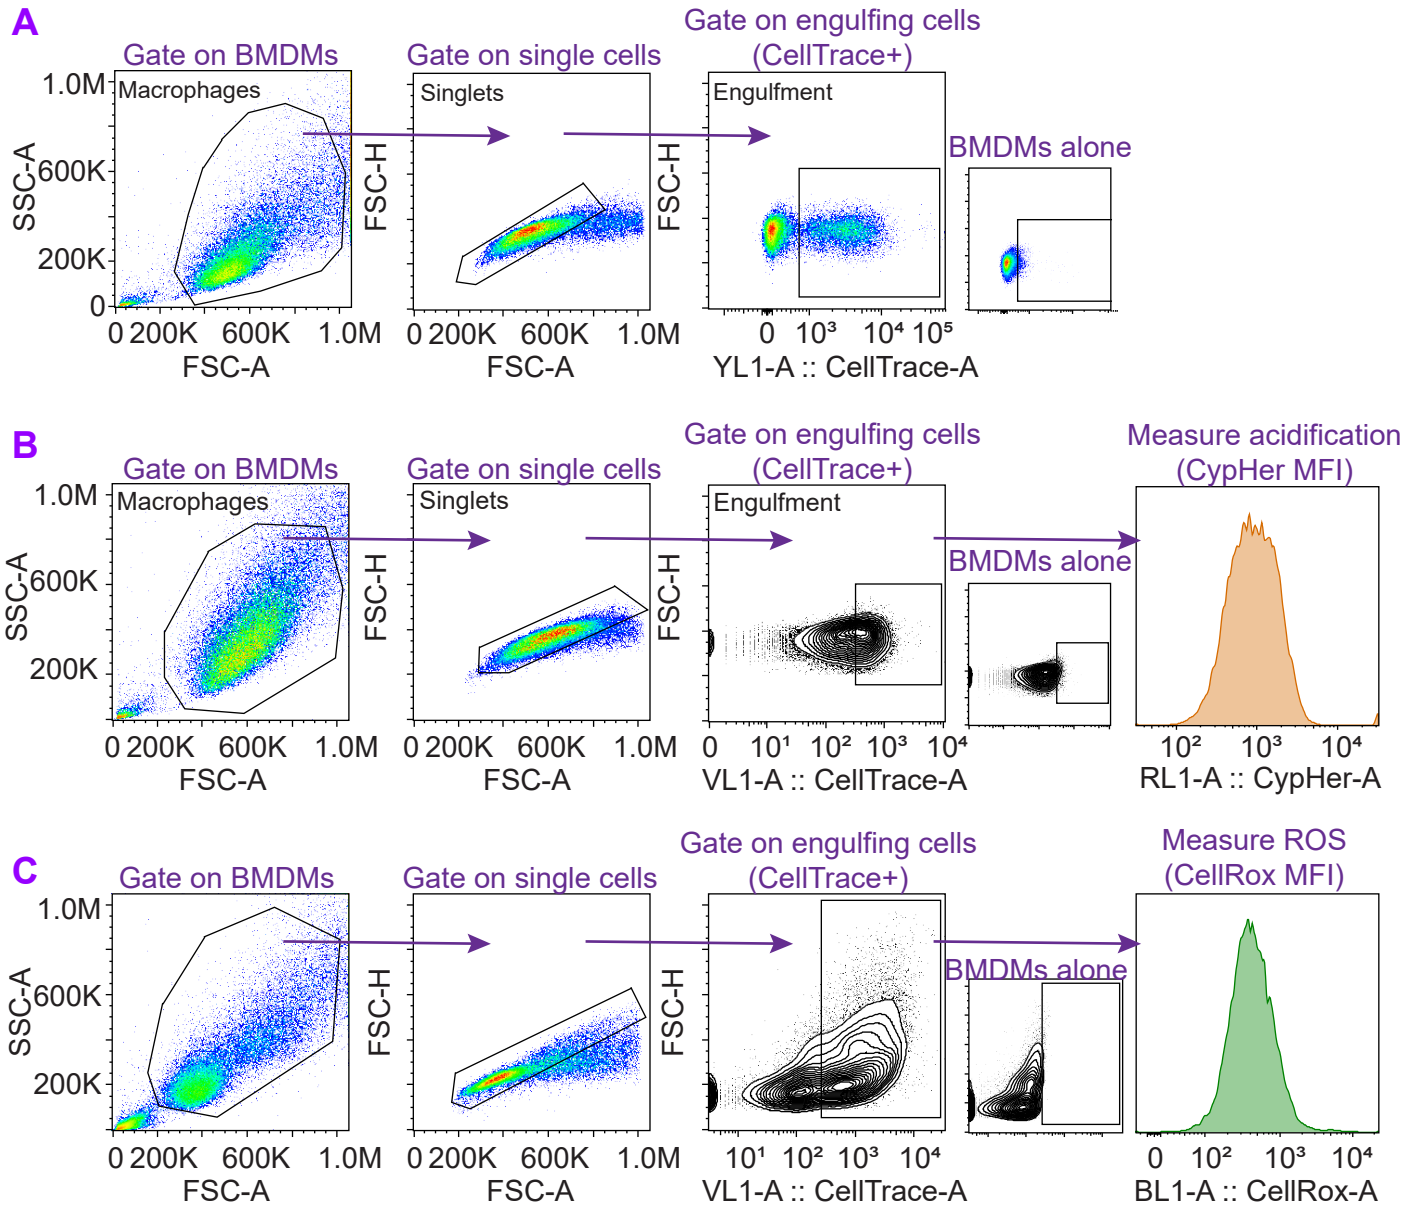

**Figure S3. Gating strategy for flow cytometry (with Fig. 5)**

- A.** Gating strategy for measuring engulfment of *C. albicans* in BMDMs.
- B.** Gating strategy for measuring phagosome acidification of *C. albicans* in BMDMs.
- C.** Gating strategy for measure phagosomal ROS in BMDMs.

**Figure S4. Mitochondrial ROS, and validation of phagosomal ROS by flow cytometry (with Fig. 5)**

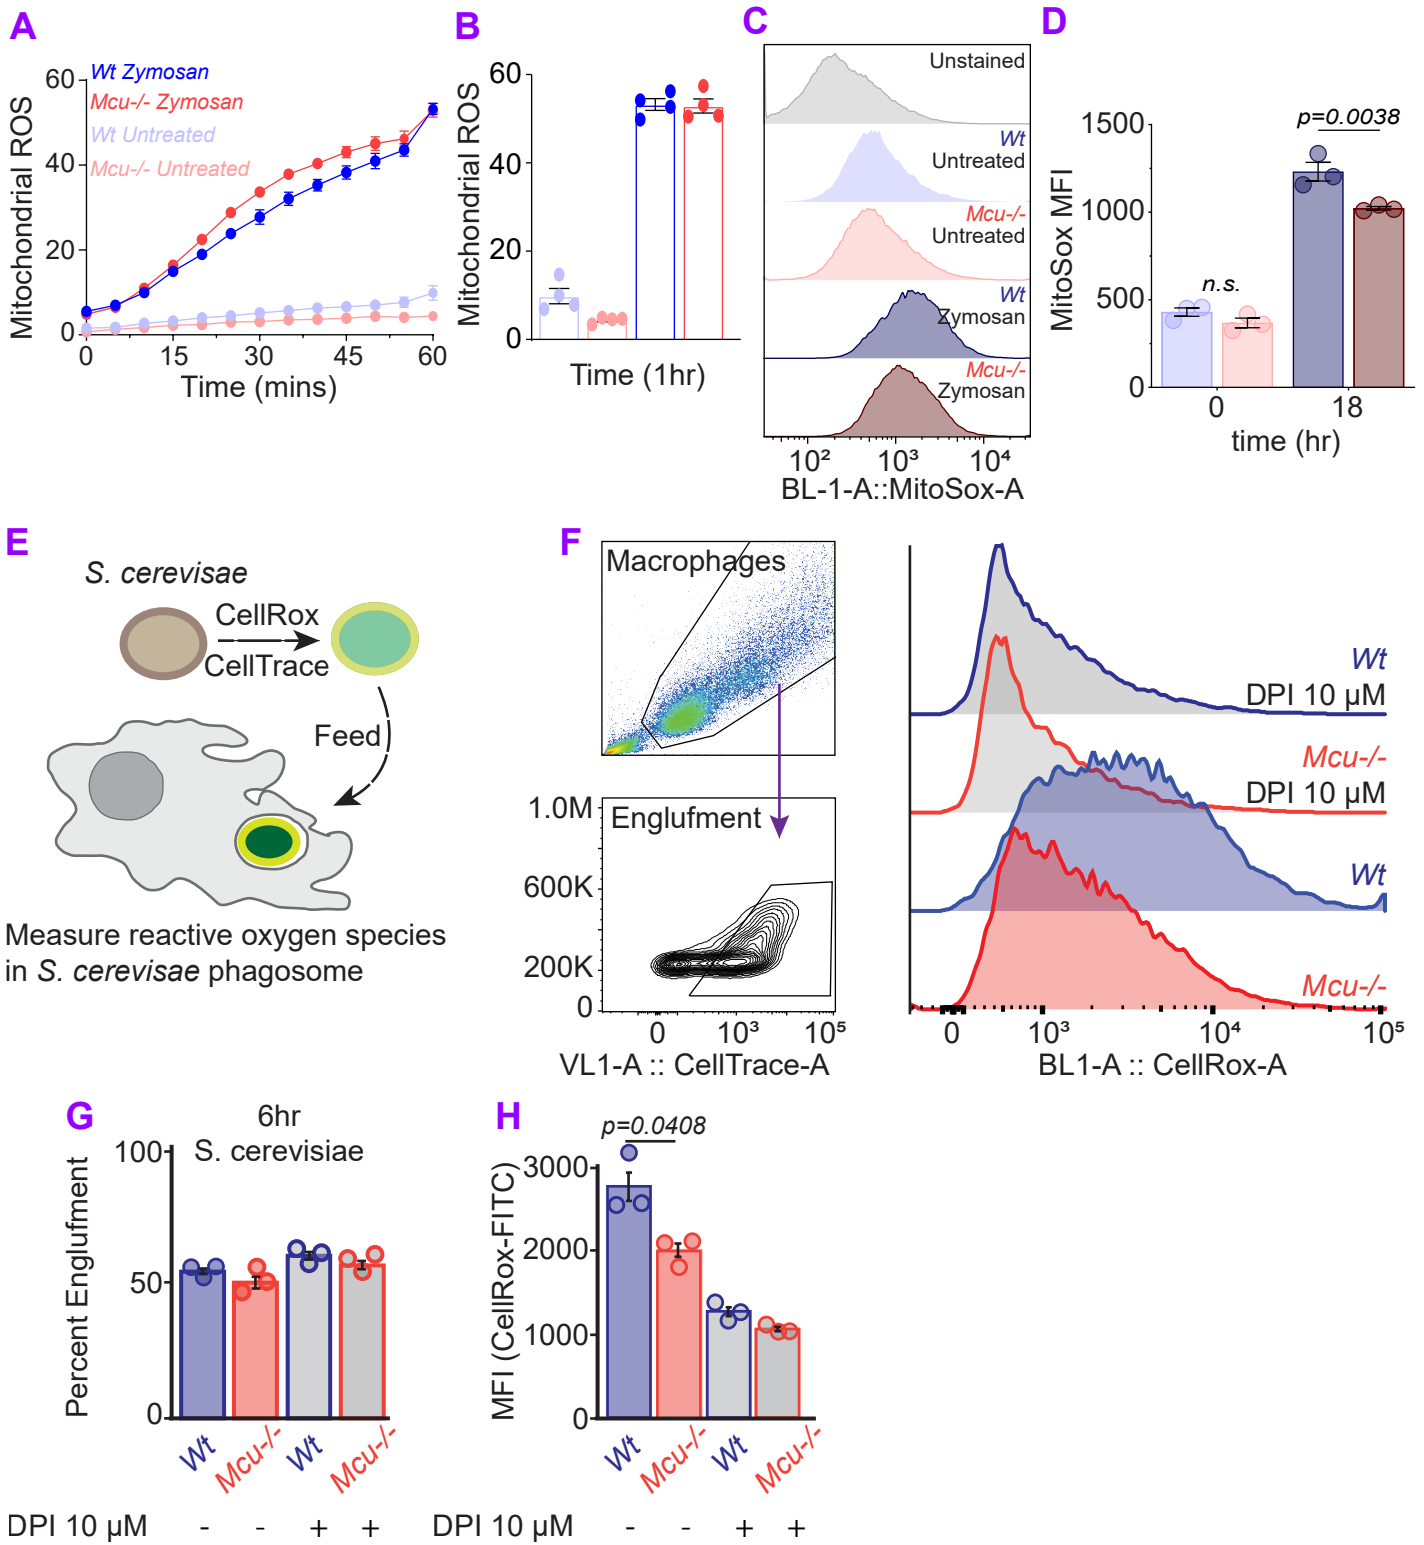

#### Figure S4. Mitochondrial ROS, and validation of phagosomal ROS by flow cytometry (with Fig. 5)

- A.** Change in MitoSox fluorescence in *wt* (n=4) and *Mcu*<sup>-/-</sup> (n=4) macrophages stimulated with zymosan. Fluorescence was recorded every 5 min (Ex: 510, Em: 580). Zymosan was added at 2 particles per cell prior to recording. Error bars represent SEM.
- B.** Quantification of MitoSox fluorescence at 60 min post zymosan stimulation. No significant difference was found between *wt* (n=4) and *Mcu*<sup>-/-</sup> (n=4) BMDMs. Error bars represent SEM; no significance was detected according to Welch's t test, two-tailed.
- C.** Representative histograms from *wt* and *Mcu*<sup>-/-</sup> BMDMs.
- D.** Quantification of MitoSox flow cytometry from *wt* (n=3) and *Mcu*<sup>-/-</sup> (n=3) bone-marrow derived macrophages. Cells were treated for 18 h with Zymosan 2:1, particles per cell. Error bars represent SEM;  $p=0.0038$  according to 2-way ANOVA, two-tailed.
- E.** Schematized experimental design to measure phagosomal ROS in BMDMs. *S. cerevisiae* were labeled with CellRox (reports oxidative stress) and CTV (to confirm engulfment) prior to phagocytosis.
- F.** Flow cytometry gating strategy for measuring phagosomal ROS in BMDMs engulfing *S. cerevisiae*.
- G.** Quantification of CTV<sup>+</sup> cells (measures engulfment) at 6 h post phagocytosis for *wt* (n=3), *Mcu*<sup>-/-</sup> (n=3) BMDMs. Macrophages were treated with DPI (10  $\mu$ M, inhibitor of NADPH oxidase) or vehicle control (DMSO) for the duration of the experiment. Error bars represent SEM; no significant difference was detected between *wt* and *Mcu*<sup>-/-</sup> in either condition according to Welch's, two-tailed test.
- H.** Quantification of phagosomal ROS (CellRox fluorescence) in *wt* (n=3) and *Mcu*<sup>-/-</sup> (n=3) BMDMs, after 6h of phagocytosis. Macrophages were treated with DPI (10 $\mu$ M) or vehicle control (DMSO) for the duration of the experiment. Error bars represent SEM;  $p=0.0408$  according to Welch's, two-tailed test.

**Figure S5. NADPH/NADP+ biochemical analysis, and Seahorse quantification (with Fig. 6)**

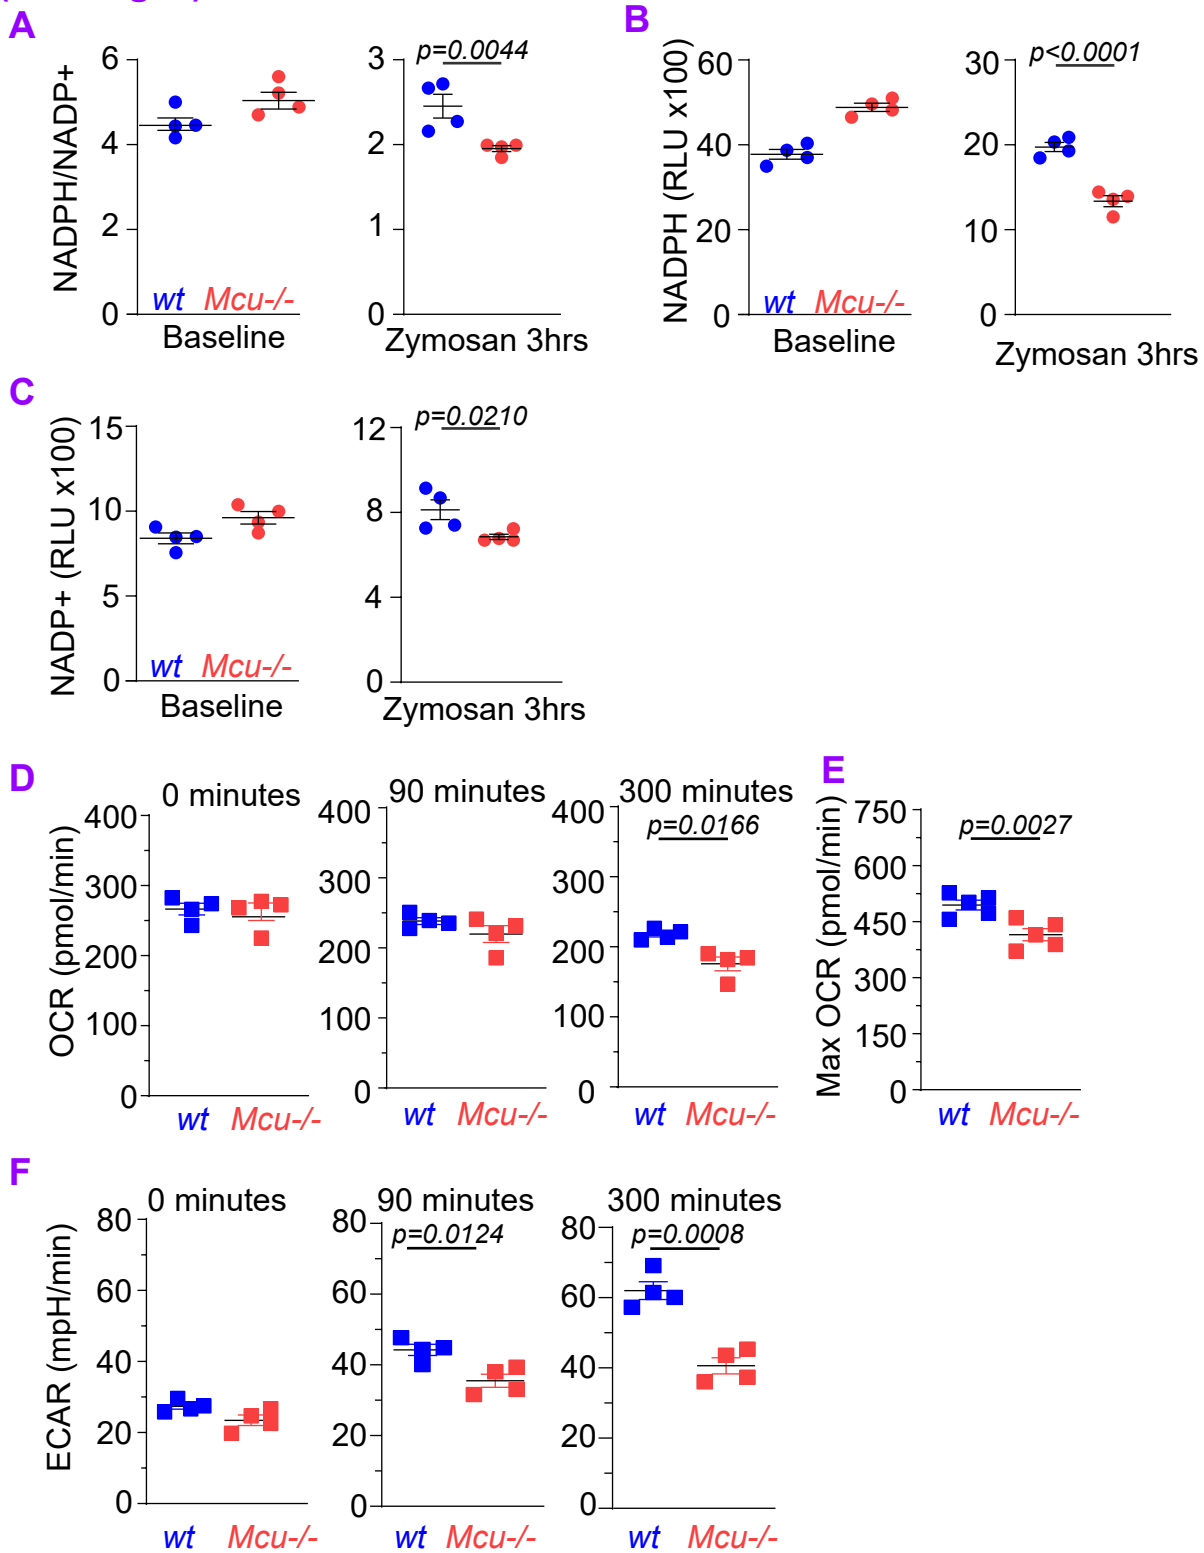



### Figure S5. NADPH/NADP+ biochemical analysis, and Seahorse quantification (with Fig. 6)

**A.** NADPH/NADP+ ratios in *wt* and *Mcu*<sup>-/-</sup> BMDMs at baseline (left panel) and after zymosan stimulation (3h, right panel). Error bars represent SEM;  $p=0.0044$  between zymosan treated *wt* (n=4) and *Mcu*<sup>-/-</sup> (n=4) according to Welch's, two-tailed test.

**B.** NADPH luminescence in *wt* and *Mcu*<sup>-/-</sup> macrophages (same experiment as panel A). Error bars represent SEM;  $p<0.0001$  between zymosan treated *wt* (n=4) and *Mcu*<sup>-/-</sup> (n=4) according to Welch's, two-tailed test.

**C.** NADP+ luminescence in *wt* and *Mcu*<sup>-/-</sup> macrophages. Error bars represent SEM;  $p=0.0210$  between zymosan treated *wt* (n=4) and *Mcu*<sup>-/-</sup> (n=4) according to Welch's, two-tailed test.

**D.** Quantification of OCR at baseline, 90 min and 300 min from Figure 6C. Error bars represent SEM; No significant differences were detected between zymosan treated *wt* (n=4) and *Mcu*<sup>-/-</sup> (n=4) according to Welch's, two-tailed test.

**E.** Quantification of maximal OCR following the addition of BAM15 (mitochondrial uncoupler) from Figure 6C. Error bars represent SEM;  $p=0.0059$  between zymosan treated *wt* (n=4) and *Mcu*<sup>-/-</sup> (n=4) according to Welch's, two-tailed test.

**F.** Quantification of ECAR at baseline, 90 min and 300 min from Figure 6D. Error bars represent SEM;  $p=0.0351$  at 90 min and  $p=0.0003$  at 300 min between zymosan treated *wt* (n=4) and *Mcu*<sup>-/-</sup> (n=4) according to Welch's, two-tailed test.

**Figure S6. Metabolomic analysis of glycolysis and pentose phosphate pathway (with Fig. 7)**

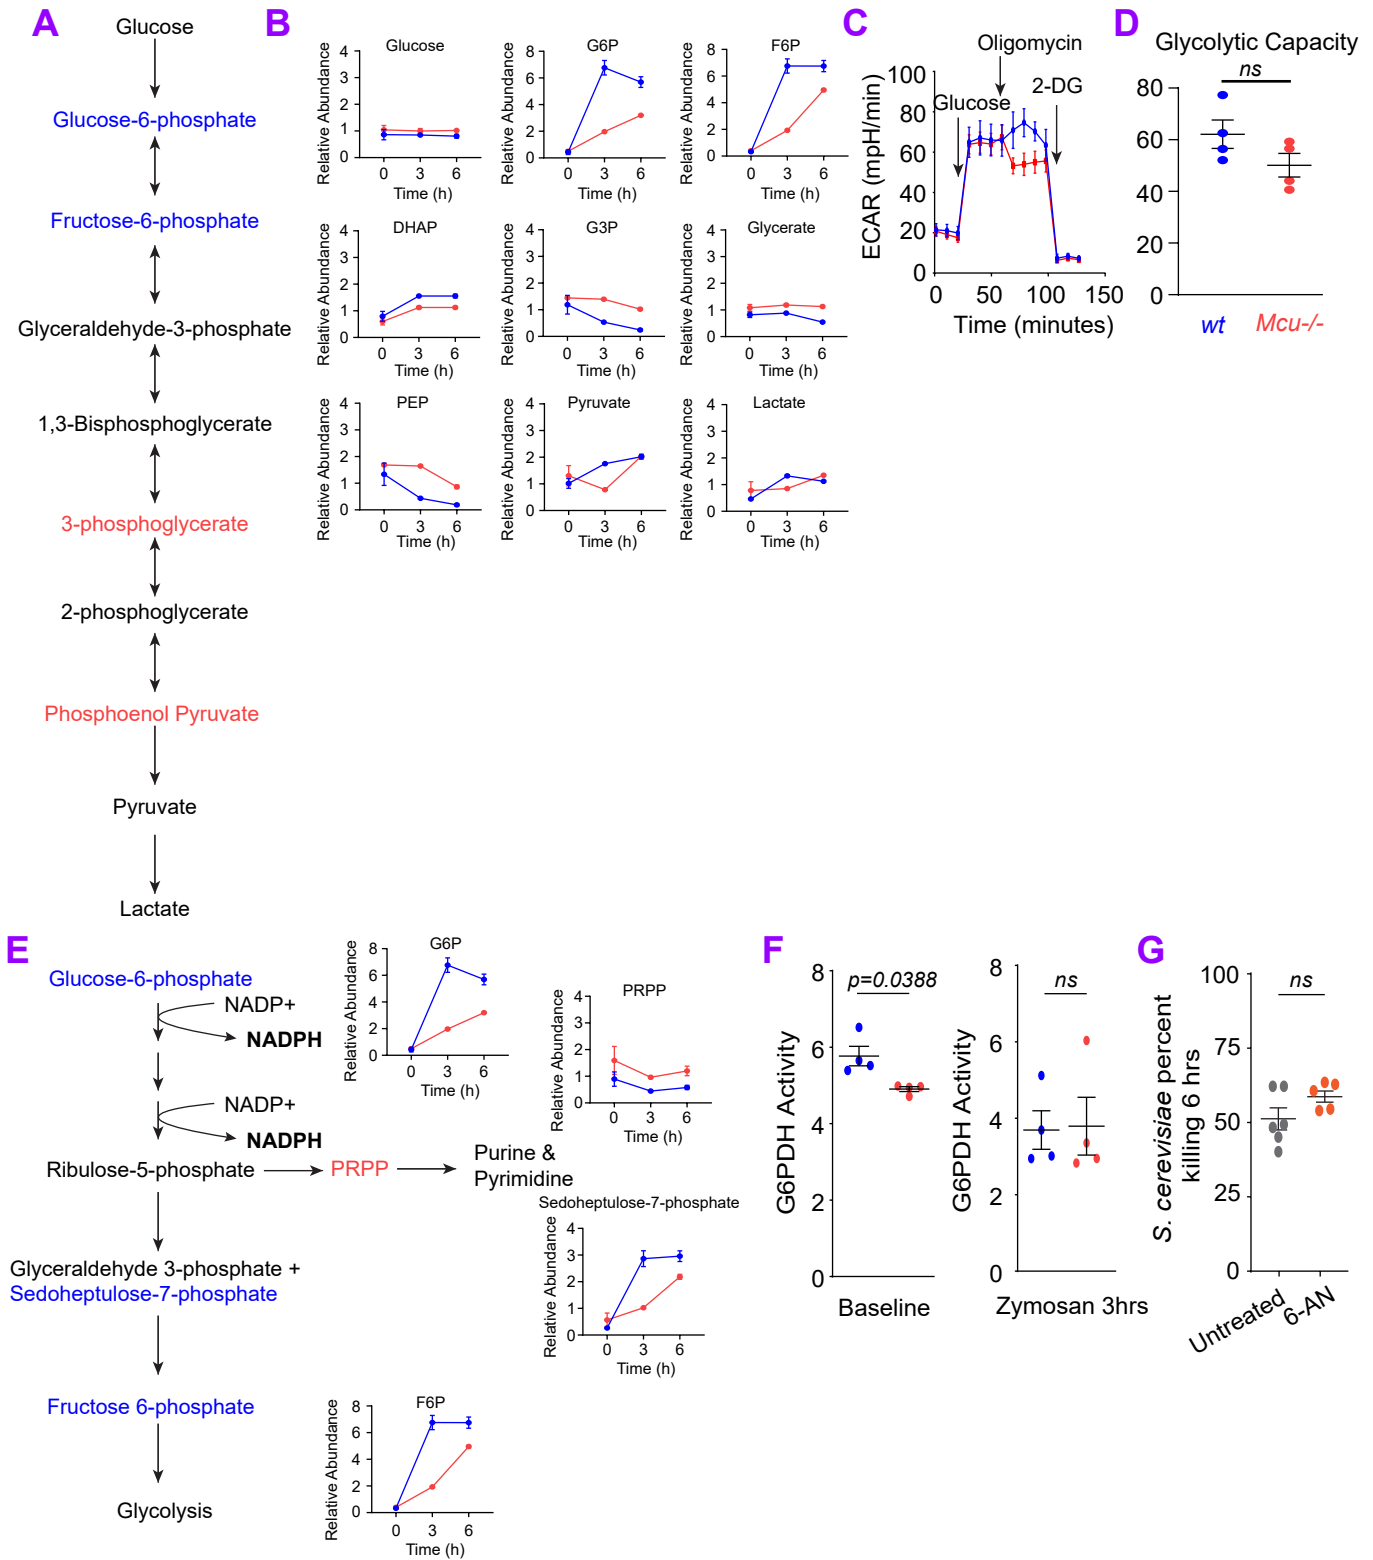

## Figure S6. Metabolomic analysis of glycolysis and pentose phosphate pathway (with Fig. 7)

- A.** Schematic of glycolysis. Metabolites reduced in *Mcu*<sup>-/-</sup> BMDMs responding to zymosan (6h) are blue. Metabolites that increased in *Mcu*<sup>-/-</sup> BMDMs are red.
- B.** Glycolytic metabolites measured at 0, 3 and 6 h after zymosan stimulation in *Mcu*<sup>-/-</sup> (n=3) and *Wt* (n=3) macrophages. Error bars represent SEM.
- C.** Glycolytic Stress Test (GST) on *wt* (n=4) and *Mcu*<sup>-/-</sup> (n=4) macrophages following 6 h of zymosan stimulation. Injections are indicated with arrows.
- D.** Glycolytic capacity of *wt* and *Mcu*<sup>-/-</sup> macrophages following 6 h of zymosan stimulation. Error bars are representing SEM, and significance was determined by Welch's, two-tailed t test.
- E.** Schematic of pentose phosphate pathway. Metabolites reduced in *Mcu*<sup>-/-</sup> BMDMs responding to zymosan (6h) are blue. Metabolites that increased in *Mcu*<sup>-/-</sup> BMDMs are red. Pentose phosphate pathway metabolites measured at 0, 3 and 6 h after zymosan stimulation in *Mcu*<sup>-/-</sup> (n=3) and *Wt* (n=3) macrophages. Error bars represent SEM.
- F.** G6PDH activity was assessed using a colorimetric assay. *Mcu*<sup>-/-</sup> macrophages showed a modest reduction in G6PDH activity at baseline but not after 3 h of zymosan stimulation. Error bars represent SEM (n=4);  $p=0.0196$  according to 2-way ANOVA, two-tailed
- G.** Killing of *S. Cerevisiae* by BMDMs treated with vehicle (n=6) or 100  $\mu$ M 6-Aminonicotinamide (n=5). Error bars represent SEM from five independent experiments. No significant difference was detected by Welch's t test, two tailed

**Figure S7. Metabolomic analysis of TCA cycle and quantification of pPDH IF (with Fig. 7)**

**A**

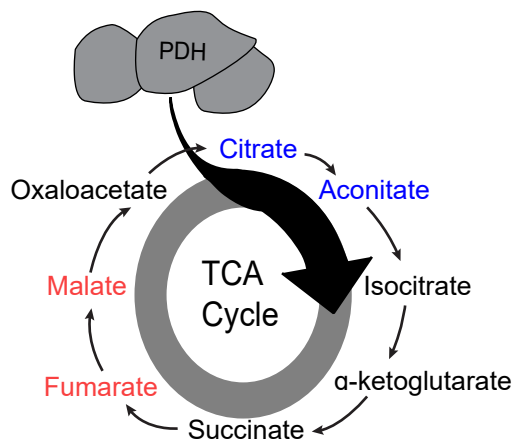

**B**

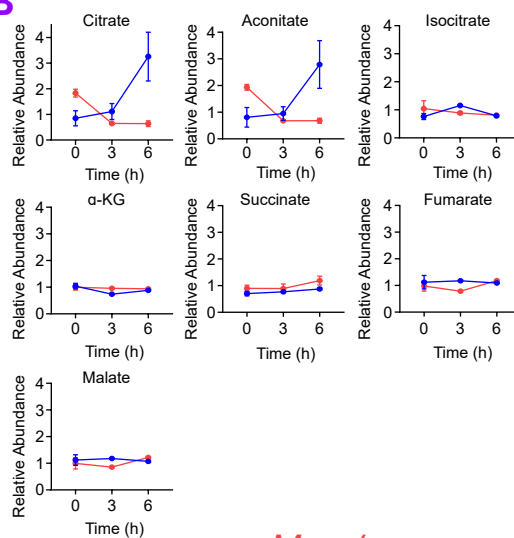

**C**

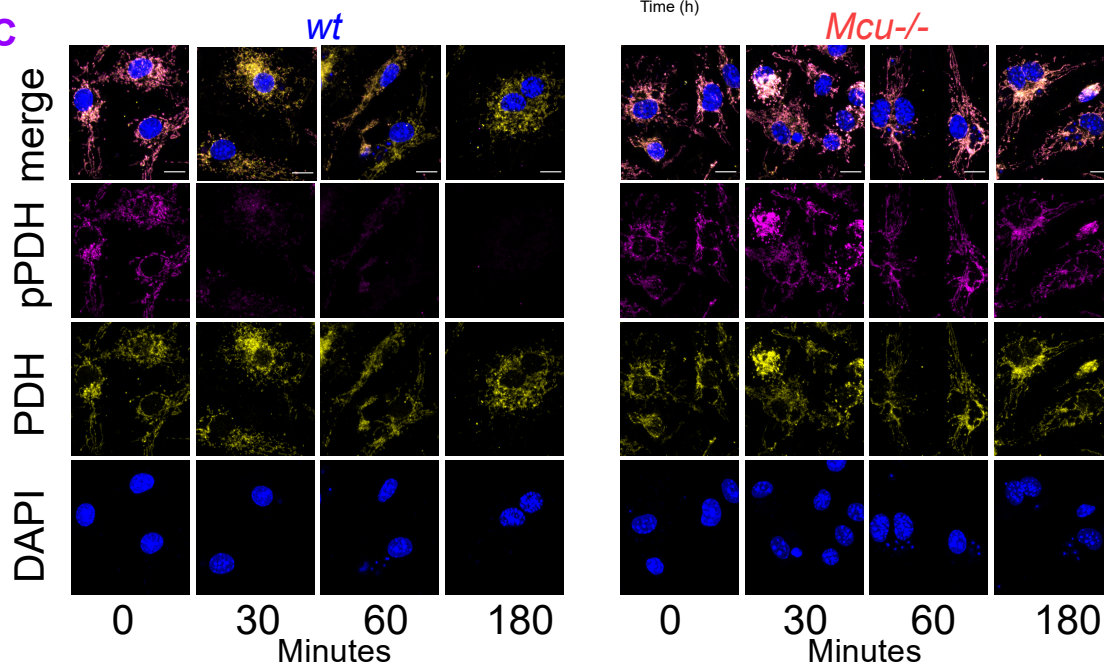

**D**

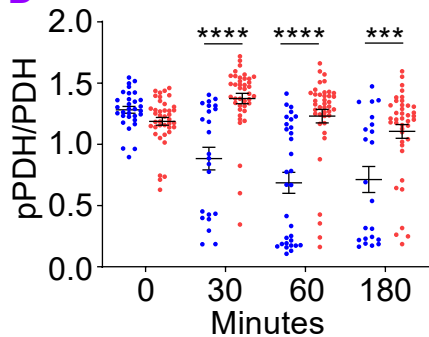

**E**

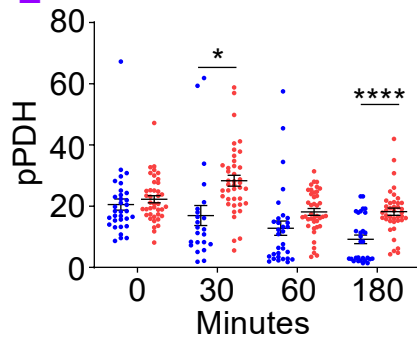

**F**

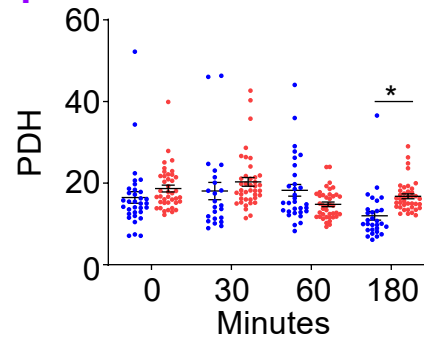

## Figure S7. Metabolomic analysis of TCA cycle and quantification of pPDH IF (with Fig. 7)

**A.** Schematic of TCA cycle. Significantly decreased metabolites are blue and significantly increased metabolites are red. Significance was determined by Welch's, two-tailed t test.

**B.** TCA cycle metabolites measured at 0, 3 and 6 hours after zymosan stimulation in *Mcu*<sup>-/-</sup> (n=3) and *Wt* (n=3) macrophages. Error bars represent SEM.

**C.** Representative IF images from *wt* and *Mcu*<sup>-/-</sup> BMDMs responding to *C. albicans*. pPDH (magenta LUT), PDH (yellow LUT), and nucleus (DAPI; blue LUT) were acquired using LSM880 confocal microscope. Scale bar is 10  $\mu$ m.

**D.** Quantification of pPDH/PDH from *wt* and *Mcu*<sup>-/-</sup> macrophages in response to *C. albicans*. Cells quantified for each time point are 0 h (n=31), 30 min (n=23), 60 min (n=31), and 180 min (n=22) for *wt*. For *Mcu*<sup>-/-</sup> all time points n=40 cells were quantified. Error bars represent SEM; *p*-values (\*\**p*<0.0001, \*\*\*\**p*<0.0001) was detected according to 2-way ANOVA, two-tailed.

**E.** Quantification of pPDH from *wt* and *Mcu*<sup>-/-</sup> macrophages in response to *C. albicans*. Cells quantified for each time point are 0 h (n=31), 30 min (n=23), 60 min (n=31), and 180 min (n=22) for *wt*. For *Mcu*<sup>-/-</sup> all time points n=40 cells were quantified. Error bars represent SEM; *p*-values (\*\**p*<0.001, \*\*\*\**p*<0.0001) according to 2-way ANOVA, two-tailed.

**F.** Quantification of PDH from *wt* and *Mcu*<sup>-/-</sup> macrophages in response to *C. albicans*. Cells were combined from three independent experiments. Error bars represent SEM; \**p*=0.0109 was detected according to 2-way ANOVA, two-tailed.

## Supplementary Methods

Clinical scoring parameters for *in vivo* candidiasis:

| Scoring Parameter: | 0                                       | 1                                                              | 2                                                                        |
|--------------------|-----------------------------------------|----------------------------------------------------------------|--------------------------------------------------------------------------|
| Conjunctivitis     | Normal                                  | Single eye open with visible discharge                         | Eyes closed with discharge and swelling                                  |
| Lethargy           | Normal locomotion and reaction, >3steps | Inactive, <3 steps after moderate stimulation, slight hunching | Only lifting of head after moderate stimulation <1 step, severe hunching |
| Hair Coat          | Well-groomed with smooth coat           | Rough coat, minor ruffling                                     | Unkempt fur, dull coat                                                   |
| Grimace Pain       | Normal                                  | Moderate orbital tightening or nose bulge                      | Sever orbital tightening, nose bulge, and collapsed ear position         |
| Stool              | Normal                                  | Visible diarrhea                                               | Bloody diarrhea, sunken in abdomen                                       |
